# Supplementary material for: dGLYAT modulates Gadd45-mediated JNK activation and cell invasion
Source: Research Square preprint supplement (doi:10.21203/rs.3.rs-1290505/v1), 2022-01-27
Supplement: Supplementary file 1 [file ab3142286db9396937215877.xlsx]

## Sheet: Sheet1
Table S1
id	foldChange(R6/W6)(R6/W6)	log2FoldChange	pval	padj	Chromosome	Name
FBgn0029990	0.125524	-2.99397	5.12439e-58	6.60483e-54	X	CG2233
FBgn0030673	0.01689	-5.88769	4.04443e-39	2.60643e-35	X	CG15601
FBgn0038301	0.251843	-1.9894	4.62916e-24	1.98884e-20	3R	CG6654
FBgn0033836	0.0915086	-3.44995	3.69099e-21	1.18933e-17	2R	CG18278
FBgn0052581	3.6813	1.88022	1.03455e-18	2.66685e-15	X	CG32581
FBgn0036880	0.0177489	-5.81612	4.00687e-17	8.60742e-14	3L	Cpr76Bc
FBgn0040256	0.324518	-1.62363	2.25339e-15	4.14913e-12	3R	Ugt35C1
FBgn0052279	0.0770877	-3.69735	2.93732e-15	4.7324e-12	3L	Drsl2
FBgn0004057	0.219588	-2.18713	4.88717e-14	6.99897e-11	X	Zw
FBgn0003082	0.353784	-1.49906	6.02013e-14	7.75934e-11	2R	phr
FBgn0039798	6.55325	2.71221	4.39349e-13	5.14798e-10	3R	CG11313
FBgn0015714	398.73	8.63927	7.98539e-13	8.57697e-10	2R	Cyp6a17
FBgn0030048	0.327961	-1.6084	2.86208e-12	2.83765e-09	X	CG12112
FBgn0035855	0.289594	-1.7879	1.07318e-10	9.88012e-08	3L	CG7366
FBgn0026176	0.228781	-2.12796	1.27664e-10	1.09698e-07	2R	SkpB
FBgn0085244	0.286934	-1.80121	2.15531e-09	1.67246e-06	2R	CG34215
FBgn0037405	0.243034	-2.04077	2.2059e-09	1.67246e-06	3R	CG1077
FBgn0035673	0.283137	-1.82043	3.84168e-09	2.67621e-06	3L	CG6602
FBgn0052475	0.471793	-1.08378	3.94506e-09	2.67621e-06	3L	mthl8
FBgn0039459	2.34744	1.23109	5.59914e-09	3.60837e-06	3R	IntS12
FBgn0053926	0.348624	-1.52026	7.08946e-09	4.35124e-06	3L	CG33926
FBgn0261990	0.319059	-1.6481	8.98236e-09	5.26244e-06	2R	CG42808
FBgn0264272	0.450477	-1.15047	1.59825e-08	8.68776e-06	3L	mwh
FBgn0037304	2.63723	1.39902	1.61771e-08	8.68776e-06	3R	CG1113
FBgn0029728	3.71476	1.89327	1.78203e-08	9.18744e-06	X	CG2861
FBgn0000092	0.197094	-2.34304	2.28621e-08	1.13335e-05	X	CG2650
FBgn0035344	0.30779	-1.69998	3.06411e-08	1.44768e-05	3L	Cyp4d20
FBgn0035348	0.426672	-1.2288	3.14493e-08	1.44768e-05	3L	CG16758
FBgn0263830	4.21588	2.07583	4.83423e-08	2.14857e-05	X	CG40486
FBgn0052751	0.255177	-1.97043	7.6682e-08	3.29451e-05	X	CG32751
FBgn0025632	0.470499	-1.08774	1.49767e-07	6.22693e-05	X	CG4313
FBgn0035985	0.536378	-0.898677	2.16076e-07	8.70313e-05	3L	Cpr67B
FBgn0033153	0.402804	-1.31185	2.88102e-07	0.000107307	2R	Gadd45
FBgn0026602	0.429037	-1.22082	2.91973e-07	0.000107307	2R	Ady43A
FBgn0034335	2.15309	1.10641	2.97752e-07	0.000107307	2R	GstE1
FBgn0039754	0.524119	-0.932033	2.99718e-07	0.000107307	3R	CG9747
FBgn0013278	574.537	9.16626	4.02224e-07	0.000140115	3R	Hsp70Bb
FBgn0038194	0.356746	-1.48703	6.48875e-07	0.000220088	3R	Cyp6d5
FBgn0035806	0.383534	-1.38257	9.0158e-07	0.000297961	3L	PGRP-SD
FBgn0029762	0.534534	-0.903646	1.10712e-06	0.000356741	X	NAAT1
FBgn0037930	1.86487	0.899076	1.32292e-06	0.00041588	3R	CG14715
FBgn0004034	19.1061	4.25596	1.37676e-06	0.0004225	X	y
FBgn0029676	0.526552	-0.925352	1.61568e-06	0.000484292	X	HIP-R
FBgn0011695	0.362272	-1.46485	1.97321e-06	0.000578016	2R	EbpIII
FBgn0031117	0.558468	-0.840455	2.21078e-06	0.000633218	X	GstT3
FBgn0013307	0.506003	-0.982781	2.5559e-06	0.000716153	2R	Odc1
FBgn0266591	3.90657	1.9659	2.64463e-06	0.000725246	3L	CG45116
FBgn0030105	3.26766	1.70826	3.16813e-06	0.000850708	X	CG15369
FBgn0033942	2.54116	1.34549	3.67453e-06	0.000966552	2R	Cpr51A
FBgn0034470	0.388	-1.36587	3.8813e-06	0.00100052	2R	Obp56d
FBgn0028422	0.522889	-0.935422	5.08861e-06	0.00128602	3R	GluRIID
FBgn0028400	1.77995	0.831839	5.21707e-06	0.00129313	3R	Syt4
FBgn0052191	0.555452	-0.848265	5.76886e-06	0.00140292	3L	CG32191
FBgn0262983	2.61884	1.38893	6.10441e-06	0.00145703	3R	CG43291
FBgn0037222	0.495393	-1.01335	6.31889e-06	0.0014808	3R	CG14642
FBgn0053329	0.468434	-1.09408	8.62833e-06	0.0019859	3R	Sp212
FBgn0036230	0.223138	-2.16399	1.12527e-05	0.00254448	3L	CG11570
FBgn0038830	1.76797	0.822096	1.4882e-05	0.00330715	3R	CG17272
FBgn0034733	0.522188	-0.937358	1.51833e-05	0.0033169	2R	CG4752
FBgn0041180	1.71157	0.775318	1.59634e-05	0.0034292	2L	Tep4
FBgn0037085	0.221876	-2.17217	1.74383e-05	0.00368463	3L	Neu2
FBgn0011296	1.87196	0.904551	2.0374e-05	0.0042355	2R	l(2)efl
FBgn0034025	1.66736	0.737563	2.5821e-05	0.00528266	2R	Pgant1
FBgn0033789	0.278371	-1.84492	2.85484e-05	0.00574939	2R	CG13324
FBgn0062565	10.7814	3.43047	2.96975e-05	0.00588878	X	Or19b
FBgn0036588	0.388667	-1.36339	3.05033e-05	0.00595692	3L	CG13068
FBgn0028583	1.95378	0.966265	3.16439e-05	0.00608744	X	lcs
FBgn0034479	0.560163	-0.83608	3.33057e-05	0.0063129	2R	CG8654
FBgn0030294	1.70252	0.767668	3.40865e-05	0.00636726	X	Pa1
FBgn0027560	0.616614	-0.69756	3.91321e-05	0.00720533	2L	Tps1
FBgn0036589	0.567167	-0.818155	3.97236e-05	0.00721123	3L	CG13067
FBgn0039779	3.03285	1.60068	4.99363e-05	0.0089393	3R	PH4alphaSG2
FBgn0262613	2.23336	1.15921	5.81311e-05	0.0102637	3R	CG43139
FBgn0052039	0.586827	-0.768993	6.07381e-05	0.0105791	3L	CG32039
FBgn0032598	0.289573	-1.788	6.72341e-05	0.0115544	2L	ChLD3
FBgn0037936	3.40182	1.76631	6.98884e-05	0.0118525	3R	CG6908
FBgn0035070	0.263902	-1.92193	8.07271e-05	0.0135129	2R	CG3650
FBgn0035770	0.631984	-0.662041	9.27257e-05	0.0151649	3L	pst
FBgn0031564	2.49389	1.3184	9.30352e-05	0.0151649	2L	CG2816
FBgn0082831	0.621311	-0.686613	9.59955e-05	0.0151649	3R	pps
FBgn0051219	0.146364	-2.77237	9.61559e-05	0.0151649	3R	CG31219
FBgn0035904	0.530211	-0.915362	9.72308e-05	0.0151649	3L	GstO3
FBgn0028956	0.494836	-1.01498	9.76558e-05	0.0151649	2R	mthl3
FBgn0000826	0.0931832	-3.42379	0.000108444	0.0166397	X	png
FBgn0004427	17.6125	4.13853	0.000113023	0.0171383	3L	LysD
FBgn0031069	0.632665	-0.660486	0.000115434	0.0173003	X	Pmp70
FBgn0036738	0.0931079	-3.42495	0.000124381	0.018427	3L	CG7542
FBgn0262530	2.95373	1.56254	0.000127176	0.01845	3L	CG43084
FBgn0050090	0.412357	-1.27804	0.000127399	0.01845	2R	CG30090
FBgn0030955	0.608654	-0.716305	0.000137994	0.0197271	X	CG6891
FBgn0051380	0.180342	-2.47119	0.000139561	0.0197271	3R	CG31380
FBgn0270926	0.622572	-0.683686	0.00014081	0.0197271	3L	AsnS
FBgn0032652	2.40399	1.26543	0.000143271	0.0198561	2L	CG6870
FBgn0260393	1.74252	0.801177	0.000146452	0.019877	3L	CG17147
FBgn0036556	1.58271	0.6624	0.000146506	0.019877	3L	CG5830
FBgn0046879	0.212769	-2.23264	0.000149923	0.0201287	2R	Obp56c
FBgn0035325	0.631361	-0.663464	0.000157371	0.0209109	3L	CG13806
FBgn0002562	1.98527	0.989332	0.000169694	0.0223182	X	Lsp1alpha
FBgn0085455	0.537214	-0.896432	0.00018643	0.0242716	3L	CG34426
FBgn0030981	0.512197	-0.965229	0.000191965	0.0247423	X	CG14191
FBgn0053198	0.55725	-0.843603	0.000210862	0.0269089	2R	pen-2
FBgn0033683	1.63356	0.708017	0.000213561	0.0269862	2R	CG18343
FBgn0039244	0.484309	-1.046	0.000218601	0.0273548	3R	CG11069
FBgn0033875	0.547907	-0.867996	0.000221862	0.027496	2R	CG6357
FBgn0034045	0.598805	-0.739842	0.000230028	0.0282364	2R	CG8249
FBgn0051810	0.524328	-0.931458	0.000243455	0.0294793	2L	CG31810
FBgn0058191	0.631176	-0.663886	0.000244727	0.0294793	2R	CG40191
FBgn0004425	19.6238	4.29453	0.000259539	0.0309741	3L	LysB
FBgn0031489	0.612881	-0.706321	0.000262604	0.0310523	2L	CG17224
FBgn0011722	0.54683	-0.870835	0.000267481	0.0313414	2L	Tig
FBgn0035691	0.462703	-1.11184	0.000278623	0.0323528	3L	CG7386
FBgn0052706	2.72208	1.44471	0.000285506	0.0328562	X	CG32706
FBgn0032253	1.59533	0.673857	0.000316313	0.0360556	2L	LManI
FBgn0033363	0.331231	-1.59409	0.000320427	0.0360556	2R	CG13744
FBgn0003965	1.66606	0.736436	0.00032257	0.0360556	X	v
FBgn0030575	2.13839	1.09653	0.000324497	0.0360556	X	CG5321
FBgn0030803	1.64305	0.716378	0.000342994	0.037785	X	CG4880
FBgn0010041	0.253693	-1.97884	0.00035255	0.0384242	3R	GstD5
FBgn0034253	1.53368	0.616996	0.000359066	0.0384242	2R	CG10936
FBgn0032010	0.652265	-0.616469	0.000359643	0.0384242	2L	CG8086
FBgn0032773	2.05018	1.03575	0.000361519	0.0384242	2L	fon
FBgn0036557	0.605913	-0.722816	0.000363702	0.0384242	3L	mRpS31
FBgn0039678	1.54602	0.628558	0.000373232	0.0390906	3R	Obp99a
FBgn0262529	1.80988	0.855891	0.000376075	0.0390906	3L	CG43083
FBgn0032631	0.449672	-1.15305	0.000384207	0.0396164	2L	CG15140
FBgn0033730	1.57855	0.658596	0.000387518	0.0396406	2R	Cpr49Ag
FBgn0051865	0.445603	-1.16617	0.000448336	0.0455008	2L	Ada1-1
FBgn0035578	0.572817	-0.803854	0.000474423	0.0477721	3L	CG13707
FBgn0051950	4.51666	2.17526	0.000479552	0.0479144	2L	Sbat
FBgn0038886	0.164738	-2.60176	0.000491272	0.0487077	3R	Ugt49B2
FBgn0034966	0.341293	-1.55092	0.000506664	0.0498503	2R	CG13563
FBgn0052271	0.410264	-1.28538	0.000521588	0.0502194	3L	CG32271
FBgn0043854	0.541008	-0.886278	0.000521771	0.0502194	2L	slam
FBgn0032281	1.92421	0.944266	0.000522104	0.0502194	2L	CG17107
FBgn0038412	0.469558	-1.09062	0.000539353	0.0514942	3R	Zip89B
FBgn0051014	1.82432	0.867358	0.000559215	0.052998	3R	PH4alphaSG1
FBgn0283437	1.91038	0.933856	0.000589163	0.0554286	2R	PPO1
FBgn0047095	2.59606	1.37632	0.000603128	0.0563313	X	CG33939
FBgn0053138	0.638632	-0.646944	0.000614243	0.0569567	2R	AGBE
FBgn0053460	0.487165	-1.03752	0.000678394	0.0620886	2R	CG33460
FBgn0001090	0.585761	-0.771615	0.000679222	0.0620886	X	bnb
FBgn0034624	0.52433	-0.931454	0.000719189	0.0652791	2R	CG17974
FBgn0034438	0.650209	-0.621024	0.000758916	0.0684033	2R	CG9416
FBgn0038674	1.58171	0.661481	0.000785089	0.0702709	3R	CG14285
FBgn0262607	0.0681013	-3.87617	0.000794724	0.0703189	X	CG43133
FBgn0035856	0.29386	-1.7668	0.000796537	0.0703189	3L	CG13679
FBgn0033395	2.21496	1.14728	0.000806632	0.0707257	2R	Cyp4p2
FBgn0030196	1.70873	0.772924	0.000812445	0.070754	X	Psf3
FBgn0260004	2.91236	1.54219	0.000826089	0.0712478	3R	Snmp1
FBgn0039297	1.65161	0.723871	0.000829169	0.0712478	3R	CG11852
FBgn0038079	1.78068	0.832428	0.000854088	0.0729029	3R	NijC
FBgn0034493	0.485481	-1.04251	0.000892028	0.0756404	2R	CG8908
FBgn0263219	1.53057	0.614072	0.000898115	0.0756588	3L	Dscam4
FBgn0023129	0.555215	-0.848882	0.000913951	0.0763293	3L	aay
FBgn0013770	0.680169	-0.556035	0.000917993	0.0763293	2R	Cp1
FBgn0284435	1.52584	0.609604	0.00092384	0.0763293	X	tyn
FBgn0034011	0.398867	-1.32602	0.000978812	0.0803561	2R	CG8160
FBgn0029608	1.76957	0.8234	0.00100319	0.0818365	X	CG3091
FBgn0014427	0.583607	-0.776931	0.00101477	0.0822601	3R	CG11899
FBgn0038239	596.731	9.22094	0.0010375	0.0835768	3R	CG14850
FBgn0086450	0.61686	-0.696986	0.00106752	0.0854611	X	su(r)
FBgn0035409	0.608946	-0.715615	0.00108259	0.0861327	3L	CG14963
FBgn0010812	0.671801	-0.573894	0.00112089	0.0886329	3R	unc-45
FBgn0038260	0.273665	-1.86952	0.00113309	0.0890509	3R	CG14855
FBgn0032549	0.41232	-1.27816	0.00116138	0.0902951	2L	CG4650
FBgn0031737	0.625998	-0.675771	0.00116293	0.0902951	2L	obst-E
FBgn0035207	0.671954	-0.573565	0.00117684	0.0904487	3L	Herc4
FBgn0051326	0.231538	-2.11068	0.00117894	0.0904487	3R	CG31326
FBgn0015372	0.64351	-0.635965	0.00119741	0.0913223	2R	RabX1
FBgn0037730	0.621882	-0.685287	0.00121323	0.0919845	3R	CG9444
FBgn0038468	0.188647	-2.40624	0.00123187	0.0928511	3R	CG5225
FBgn0046875	0.62596	-0.675858	0.00126493	0.0944041	3R	Obp83g
FBgn0052679	0.403978	-1.30765	0.00126712	0.0944041	X	CG32679
FBgn0028396	0.26299	-1.92692	0.00131519	0.0974221	3R	TotA
FBgn0030065	1.49117	0.576446	0.00133212	0.0981122	X	CG12075
FBgn0010549	2.30534	1.20498	0.00134512	0.0985072	2R	l(2)03659
FBgn0037503	1.74213	0.80085	0.00139838	0.101829	3R	CG14598
FBgn0033135	0.493882	-1.01776	0.00140958	0.102068	2R	Tsp42En
FBgn0047114	1.66894	0.738935	0.001497	0.107792	3R	CG31142
FBgn0266261	2.05423	1.03859	0.00158637	0.113593	3R	CG44956
FBgn0032495	1.6485	0.721154	0.00161238	0.114818	2L	CG16820
FBgn0031097	0.49277	-1.02101	0.00164609	0.116574	X	obst-A
FBgn0053110	0.557297	-0.843483	0.0016723	0.117783	3R	CG33110
FBgn0034943	0.663552	-0.591718	0.0017146	0.120106	2R	Fmo-1
FBgn0050380	3.78128	1.91887	0.00180924	0.12605	2R	CG30380
FBgn0036985	0.6905	-0.534286	0.00185972	0.128871	3L	zye
FBgn0030883	0.588017	-0.76607	0.00187082	0.128946	X	CG7772
FBgn0040827	2.1905	1.13126	0.0018846	0.129205	3L	CG13315
FBgn0039667	0.627775	-0.671681	0.0019626	0.133184	3R	CG2010
FBgn0265413	0.691856	-0.531457	0.0019633	0.133184	X	CG44325
FBgn0053093	0.587749	-0.766728	0.00200215	0.135109	3R	CG33093
FBgn0033972	0.672457	-0.572485	0.00202983	0.13542	2R	Ciao1
FBgn0053461	0.441654	-1.17901	0.00203367	0.13542	2R	CG33461
FBgn0266581	1.47376	0.559498	0.00204157	0.13542	3R	pit
FBgn0030769	1.65895	0.730274	0.00205351	0.13542	X	CG13012
FBgn0035194	1.62788	0.702992	0.00205947	0.13542	3L	Psf1
FBgn0030326	0.607698	-0.718575	0.00206981	0.13542	X	CG2444
FBgn0050104	1.83913	0.879021	0.00215087	0.140013	2R	NT5E-2
FBgn0085224	1.70362	0.768606	0.0023972	0.155264	2R	CG34195
FBgn0267398	0.691274	-0.53267	0.00242527	0.156296	2R	Yeti
FBgn0029710	1.66729	0.737505	0.00245298	0.157296	X	CG3568
FBgn0261625	0.612508	-0.707199	0.00247583	0.157975	2R	GLS
FBgn0085261	0.713509	-0.486996	0.00249207	0.158228	2R	CG34232
FBgn0034901	5.94221	2.571	0.00254601	0.16009	2R	CG11300
FBgn0032668	2.13655	1.09528	0.00254624	0.16009	2L	CG17681
FBgn0037086	0.350464	-1.51266	0.0025921	0.162182	3L	CG7202
FBgn0260768	0.624693	-0.678781	0.00261091	0.16257	2R	CG42566
FBgn0029831	0.653547	-0.613638	0.00264625	0.163978	X	CG5966
FBgn0015034	0.561214	-0.833377	0.00265902	0.163981	2R	Cyp4e1
FBgn0035089	0.435684	-1.19864	0.00267526	0.164197	2R	Phk-3
FBgn0028945	3.74124	1.90352	0.00269095	0.164378	2L	CG7631
FBgn0032637	0.432445	-1.20941	0.00270938	0.164723	2L	CG5050
FBgn0036877	1.49779	0.582839	0.00277093	0.167674	3L	CG9452
FBgn0034965	0.50079	-0.997721	0.00281476	0.16953	2R	ppk29
FBgn0001077	9.43032	3.23731	0.00284505	0.169692	3R	ftz
FBgn0032731	0.687157	-0.541288	0.00284729	0.169692	2L	Swip-1
FBgn0013277	8.01743	3.00314	0.00285694	0.169692	3R	Hsp70Ba
FBgn0054010	0.188181	-2.40981	0.00298948	0.176361	2L	Glyat
FBgn0029895	0.681023	-0.554224	0.00299659	0.176361	X	CG14441
FBgn0033667	1.80278	0.850224	0.00306133	0.179352	2R	reb
FBgn0051431	0.687018	-0.54158	0.00315298	0.183886	3R	CG31431
FBgn0052412	0.67389	-0.569416	0.00317414	0.184286	3L	QC
FBgn0039494	0.597938	-0.741932	0.00325851	0.188336	3R	grass
FBgn0030596	5.85673	2.5501	0.00332249	0.191177	X	CG12398
FBgn0051826	3.64704	1.86672	0.00334257	0.191477	2L	CG31826
FBgn0037296	0.484547	-1.04529	0.0034486	0.196677	3R	Prosbeta2R2
FBgn0054043	0.624555	-0.6791	0.00351604	0.19964	2L	CG34043
FBgn0261799	2.33349	1.22249	0.003545	0.200401	3L	dsx-c73A
FBgn0033578	0.485286	-1.04309	0.00367141	0.206641	2R	BBS4
FBgn0086915	0.437155	-1.19378	0.00371915	0.208418	3L	Mst77F
FBgn0038818	0.493282	-1.01952	0.00373866	0.208604	3R	Nep4
FBgn0262004	3.41785	1.77309	0.00375601	0.208669	3R	CG42822
FBgn0032116	0.680924	-0.554435	0.00387712	0.214473	2L	Mco1
FBgn0030914	0.528507	-0.920006	0.00401101	0.220218	X	CG6106
FBgn0030481	0.680251	-0.555862	0.00402145	0.220218	X	CG1662
FBgn0039925	0.48784	-1.03552	0.0040454	0.220218	4	Kif3C
FBgn0034530	0.656595	-0.606925	0.00406282	0.220218	2R	Rcd6
FBgn0034391	1.87716	0.90855	0.0040664	0.220218	2R	CG15080
FBgn0259896	0.649891	-0.621731	0.00412597	0.222509	2L	NimC1
FBgn0063495	2.40458	1.26578	0.00423475	0.226683	2R	GstE5
FBgn0035091	0.715565	-0.482845	0.00423854	0.226683	2R	CG3829
FBgn0034140	0.714397	-0.485202	0.00426069	0.226926	2R	Lst
FBgn0262570	1.59741	0.675733	0.0042894	0.227061	2R	CG43110
FBgn0033458	1.94948	0.963087	0.00429846	0.227061	2R	CG18446
FBgn0038114	0.673348	-0.570576	0.00432645	0.227607	3R	CG11670
FBgn0017561	0.522145	-0.937476	0.00439408	0.229441	X	Ork1
FBgn0039152	0.713289	-0.487441	0.00439693	0.229441	3R	Root
FBgn0051901	0.64128	-0.640975	0.00448529	0.233108	2L	Mur29B
FBgn0033188	0.707843	-0.498498	0.00451683	0.233805	2R	Drat
FBgn0038147	0.667256	-0.583687	0.00457442	0.235677	3R	CCHa2
FBgn0032839	5.38021	2.42766	0.00458958	0.235677	2L	AANATL3
FBgn0051463	3.44331	1.7838	0.00461324	0.235953	3R	CG31463
FBgn0036833	2.9382	1.55493	0.00467082	0.237953	3L	CG3819
FBgn0085433	0.700883	-0.512754	0.00469207	0.238095	3R	CG34404
FBgn0043025	0.397455	-1.33114	0.00471777	0.23846	3L	Adgf-A2
FBgn0024957	0.70678	-0.500667	0.00480284	0.241401	3R	Irp-1B
FBgn0262473	0.699827	-0.514929	0.00481341	0.241401	3R	Tl
FBgn0033821	0.510015	-0.971389	0.00487994	0.243027	2R	CG10799
FBgn0036145	1.50852	0.593132	0.00488355	0.243027	3L	CG7607
FBgn0283476	0.230791	-2.11534	0.00492305	0.243157	X	Dhc16F
FBgn0038631	0.570814	-0.808907	0.00493727	0.243157	3R	CG7695
FBgn0052364	2.88361	1.52788	0.00494275	0.243157	3L	tut
FBgn0052198	4.70866	2.23532	0.00497835	0.243566	3L	CG32198
FBgn0263321	0.458813	-1.12402	0.00498885	0.243566	2L	CG43402
FBgn0016054	1.61168	0.688566	0.00500803	0.243579	2L	phr6-4
FBgn0027586	1.80975	0.855794	0.0050395	0.244173	2L	CG5867
FBgn0259992	2.13626	1.09509	0.00505813	0.244173	3R	CG42489
FBgn0036781	5.44623	2.44526	0.00509753	0.245157	3L	CG13699
FBgn0033820	3.51425	1.81322	0.00512344	0.245487	2R	CG4716
FBgn0037563	2.28071	1.18948	0.00518965	0.247739	3R	CG11672
FBgn0038250	0.709004	-0.496134	0.00522389	0.248453	3R	CG3505
FBgn0038242	0.615146	-0.700999	0.00525575	0.248725	3R	CG14852
FBgn0264503	1.51295	0.597363	0.0052682	0.248725	X	CG43902
FBgn0039690	1.40215	0.48764	0.0053524	0.250687	3R	Gnpnat
FBgn0030085	0.553732	-0.852741	0.00536579	0.250687	X	CG6999
FBgn0262605	1.61231	0.68913	0.00536811	0.250687	3R	CG43131
FBgn0058298	1.89483	0.922067	0.00545158	0.253666	3L	CG40298
FBgn0003256	0.713364	-0.48729	0.00574379	0.266301	2R	rl
FBgn0083972	0.579821	-0.786319	0.00576458	0.266307	2L	CG34136
FBgn0042106	0.315102	-1.66611	0.00580601	0.267263	3R	CG18754
FBgn0034187	0.318826	-1.64916	0.00587061	0.269275	2R	CG6967
FBgn0036875	0.70314	-0.508116	0.00591744	0.27046	3L	CG9449
FBgn0024150	0.713965	-0.486075	0.00602149	0.27335	3L	Ac78C
FBgn0033978	0.550168	-0.862055	0.00604916	0.27335	2R	Cyp6a23
FBgn0069969	0.694564	-0.525821	0.00605138	0.27335	2R	CG40498
FBgn0022355	0.566153	-0.820736	0.00607138	0.27335	X	Tsf1
FBgn0085256	2.63662	1.39869	0.0060952	0.27335	2R	CG34227
FBgn0040609	0.678936	-0.558653	0.0061079	0.27335	3R	CG3348
FBgn0036485	1.45542	0.541433	0.00616442	0.274924	3L	FucTA
FBgn0044809	0.0155568	-6.00631	0.00624019	0.277344	3R	TotZ
FBgn0260780	0.483111	-1.04957	0.00642259	0.28447	X	wisp
FBgn0014368	37.9837	5.24731	0.00648028	0.286042	3L	nol
FBgn0044050	1.64643	0.719344	0.00653582	0.287509	3L	Ilp3
FBgn0259145	1.55964	0.641215	0.00658989	0.288901	2R	CG42260
FBgn0036194	0.725978	-0.462001	0.00671253	0.293281	3L	Dph1
FBgn0037844	1.4736	0.559345	0.0068493	0.298	3R	CG4570
FBgn0034756	1.55626	0.638083	0.00686678	0.298	2R	Cyp6d2
FBgn0033753	0.635803	-0.653349	0.00692107	0.299348	2R	Cyp301a1
FBgn0039628	0.459449	-1.12202	0.00697639	0.300732	3R	CG11841
FBgn0031057	0.725346	-0.463258	0.00709537	0.304439	X	Ubqn
FBgn0040729	6.7072	2.74571	0.00710965	0.304439	2R	CG15126
FBgn0031948	0.720494	-0.472942	0.00714602	0.304984	2L	CG7149
FBgn0027600	1.39875	0.484137	0.00717159	0.305065	2L	obst-B
FBgn0263080	2.97845	1.57456	0.0072517	0.307458	2L	CG43348
FBgn0044011	0.552164	-0.85683	0.00732552	0.308865	2R	Spn43Ad
FBgn0031417	1.97043	0.978508	0.00733658	0.308865	2L	CG3597
FBgn0035767	0.724897	-0.464151	0.00735679	0.308865	3L	Cln7
FBgn0035934	1.67172	0.741335	0.00743847	0.31128	3L	TrpA1
FBgn0063670	1.44186	0.527933	0.00757849	0.316114	3L	CG40228
FBgn0043841	0.732417	-0.449262	0.00763077	0.317268	2L	vir-1
FBgn0029639	0.674559	-0.567983	0.00778462	0.322624	X	CG14419
FBgn0010294	4.35592	2.12298	0.00811628	0.335291	X	ng2
FBgn0085453	0.659272	-0.601053	0.00841504	0.34505	2R	Mthfs
FBgn0004430	2.561	1.35671	0.00841674	0.34505	3L	LysS
FBgn0263780	1.54291	0.625656	0.00845941	0.34505	2R	CG17684
FBgn0085387	0.55984	-0.836913	0.00848104	0.34505	X	shakB
FBgn0025680	1.63227	0.706882	0.00848637	0.34505	3R	cry
FBgn0052248	4.25189	2.08811	0.00854638	0.345792	3L	CG32248
FBgn0034126	1.46819	0.554043	0.00855827	0.345792	2R	jtb
FBgn0044812	0.0197161	-5.66448	0.0086711	0.347348	3R	TotC
FBgn0032262	0.631084	-0.664096	0.00867504	0.347348	2L	CG7384
FBgn0052549	0.721881	-0.470166	0.00867764	0.347348	X	CG32549
FBgn0023495	0.556757	-0.844879	0.00875138	0.349215	3R	Lip3
FBgn0039896	1.59199	0.67083	0.00885026	0.352071	4	yellow-h
FBgn0034143	0.685084	-0.545647	0.00891064	0.353382	2R	CG8303
FBgn0034022	1.61137	0.688291	0.00903505	0.357217	2R	CG12964
FBgn0024293	0.673687	-0.569849	0.00911255	0.35918	2R	Spn43Ab
FBgn0039203	0.461288	-1.11626	0.00916897	0.359486	3R	CG13618
FBgn0039094	1.54688	0.62936	0.00917612	0.359486	3R	CG10184
FBgn0030675	0.691207	-0.532809	0.00931846	0.362966	X	CG8191
FBgn0051827	0	-Inf	0.00932669	0.362966	2L	CG31827
FBgn0000360	0.409054	-1.28964	0.00934942	0.362966	X	Cp38
FBgn0035300	0.690695	-0.533879	0.00941681	0.364484	3L	CG1139
FBgn0005638	0.368549	-1.44007	0.00954697	0.36748	2R	slbo
FBgn0037174	0.681678	-0.552837	0.00955123	0.36748	3L	CG14457
FBgn0283479	1.36347	0.447286	0.00971471	0.372255	3L	Alp1
FBgn0023526	1.37122	0.455464	0.00973311	0.372255	X	CG2865
FBgn0033134	0.641974	-0.639414	0.00988461	0.376331	2R	Tsp42El
FBgn0029969	1.37463	0.459044	0.00989808	0.376331	X	CG10932
FBgn0035206	0.729573	-0.454876	0.0100967	0.380645	3L	sturkopf
FBgn0051516	0.528709	-0.919454	0.0100973	0.380645	3R	CG31516
FBgn0035865	0.627529	-0.672246	0.0101001	0.380645	3L	CG7201
FBgn0040658	0.634721	-0.655805	0.0102298	0.384409	2R	CG13516
FBgn0033367	1.69248	0.759138	0.0102887	0.385497	2R	PPO2
FBgn0040743	0.429225	-1.22019	0.0107309	0.4009	2R	CG15919
FBgn0034290	0.725694	-0.462567	0.0108634	0.404678	2R	CG5773
FBgn0039685	1.6627	0.733529	0.0109383	0.405991	3R	Obp99b
FBgn0030310	0.710579	-0.492934	0.0109617	0.405991	X	PGRP-SA
FBgn0030889	0.110871	-3.17305	0.0110411	0.406293	X	CG15373
FBgn0036566	0.741975	-0.430558	0.0110507	0.406293	3L	ClC-c
FBgn0267792	0.717878	-0.478188	0.0110644	0.406293	2R	rgr
FBgn0039564	0.586733	-0.769223	0.0114124	0.417881	3R	Nep7
FBgn0051015	0.706222	-0.501807	0.0114955	0.419163	3R	PH4alphaPV
FBgn0037115	0.348729	-1.51982	0.0115218	0.419163	3L	CG11249
FBgn0262794	3.01856	1.59386	0.0115449	0.419163	3R	CG43175
FBgn0034997	0.722093	-0.469744	0.0118772	0.428913	2R	CG3376
FBgn0053548	0.654686	-0.611126	0.0118929	0.428913	X	SmydA-8
FBgn0035861	10.618	3.40845	0.011967	0.428913	3L	CG7213
FBgn0036332	1.48342	0.568922	0.011992	0.428913	3L	Cul6
FBgn0031089	0.583901	-0.776205	0.0120585	0.428913	X	CG9572
FBgn0039070	0.405213	-1.30325	0.0120675	0.428913	3R	CG17083
FBgn0026398	0.286674	-1.80252	0.0120733	0.428913	2L	Or22a
FBgn0013764	0.607224	-0.7197	0.0121084	0.428913	2R	Chi
FBgn0030067	1.40215	0.487644	0.0121701	0.428913	X	Rbm13
FBgn0262987	1.7844	0.835436	0.0122019	0.428913	3L	CG43295
FBgn0051675	0.637656	-0.64915	0.0122084	0.428913	2L	CG31675
FBgn0026592	1.56418	0.64541	0.0122128	0.428913	3L	Fie
FBgn0259821	1.42514	0.511108	0.0123969	0.434196	3R	CG42402
FBgn0036766	2.70596	1.43614	0.0125906	0.438926	3L	CG5506
FBgn0037099	2.1469	1.10226	0.0126001	0.438926	3L	CG7173
FBgn0034828	0.486653	-1.03903	0.012849	0.444956	2R	CG13545
FBgn0036394	12.0431	3.59014	0.0128622	0.444956	3L	CG9040
FBgn0054056	0.707802	-0.498583	0.0128768	0.444956	3L	CG34056
FBgn0039099	0.45655	-1.13115	0.0129717	0.447039	3R	GILT2
FBgn0015008	0.0986836	-3.34105	0.0131216	0.450999	3R	Actn3
FBgn0033483	0.743445	-0.427703	0.01317	0.451458	2R	egr
FBgn0260747	0.745278	-0.424149	0.0132914	0.452352	X	Chchd2
FBgn0031558	4.4374	2.14971	0.0132977	0.452352	2L	CG16704
FBgn0034387	0.683408	-0.549182	0.0133014	0.452352	2R	Cyp12b2
FBgn0037819	1.38394	0.468785	0.0135025	0.457983	3R	CG14688
FBgn0023520	0.677829	-0.561007	0.0135554	0.458572	X	CG3857
FBgn0043792	0.645316	-0.631922	0.0136634	0.461014	2R	CG30427
FBgn0038974	0.740255	-0.433906	0.0137155	0.461564	3R	CG5377
FBgn0034094	0.718576	-0.476788	0.0141157	0.472608	2R	Tsf3
FBgn0039069	0.640621	-0.642458	0.014117	0.472608	3R	CG6763
FBgn0003380	0.737841	-0.438618	0.0142578	0.476084	X	Sh
FBgn0069973	0.433593	-1.20559	0.0143434	0.477706	X	CG40485
FBgn0050016	1.81666	0.861292	0.0144043	0.478089	2R	CG30016
FBgn0261393	0.689721	-0.535915	0.0144291	0.478089	3R	alpha-Est5
FBgn0035954	1.51344	0.597831	0.0144741	0.47835	3L	Doc3
FBgn0038279	1.48517	0.570624	0.0145889	0.479528	3R	Sdr
FBgn0037163	0.58312	-0.778135	0.0146728	0.479528	3L	laza
FBgn0036529	1.56717	0.648163	0.0146822	0.479528	3L	Pgant8
FBgn0051184	1.54557	0.628138	0.0147216	0.479528	3R	LSm3
FBgn0033501	0.682111	-0.551923	0.0147759	0.479528	2R	CG12911
FBgn0013563	0.734052	-0.446045	0.0148228	0.479528	3L	Pex1
FBgn0027348	1.98163	0.986686	0.0148343	0.479528	2L	bgm
FBgn0004872	0.509861	-0.971823	0.0148779	0.479528	2L	piwi
FBgn0036782	1.51946	0.603556	0.0148899	0.479528	3L	CG7320
FBgn0004403	1.32745	0.408661	0.0149448	0.479528	X	RpS14a
FBgn0036837	1.46937	0.555198	0.0149544	0.479528	3L	CG18135
FBgn0031805	0.692382	-0.530361	0.0149562	0.479528	2L	Nepl4
FBgn0031700	0.714919	-0.484148	0.0151559	0.484014	2L	CG14022
FBgn0031469	3.91903	1.9705	0.0151712	0.484014	2L	CG18558
FBgn0034741	1.4791	0.564724	0.0153706	0.489163	2R	CG4269
FBgn0030443	2.46994	1.30448	0.0156342	0.495251	X	CG12715
FBgn0035360	0.7034	-0.507583	0.0156387	0.495251	3L	CG1246
FBgn0004783	2.27564	1.18627	0.0157136	0.496403	3R	Ccp84Aa
FBgn0032402	0.648624	-0.624546	0.0158541	0.499618	2L	CG14945
FBgn0034990	0.525882	-0.92719	0.0159147	0.500303	2R	CG11406
FBgn0035160	1.51124	0.595736	0.0161385	0.506104	3L	hng3
FBgn0036547	0.751898	-0.411391	0.0162249	0.507019	3L	CG17032
FBgn0001150	1.46941	0.55524	0.0162463	0.507019	X	gt
FBgn0042118	23.3709	4.54664	0.0163859	0.510139	3L	Cpr65Ax2
FBgn0036138	Inf	Inf	0.0164843	0.5104	3L	CG14143
FBgn0030932	0.667721	-0.582684	0.0165136	0.5104	X	Ggt-1
FBgn0053462	0.129242	-2.95185	0.0165242	0.5104	2R	CG33462
FBgn0038475	0.747005	-0.42081	0.0165527	0.5104	3R	Keap1
FBgn0264556	0.606179	-0.722183	0.016618	0.511154	2L	Gr39a
FBgn0036895	0.255446	-1.96891	0.0166564	0.511154	3L	ms(3)76Cc
FBgn0036969	8.58215	3.10134	0.0171055	0.523688	3L	Spn77Bb
FBgn0002570	0.69088	-0.533493	0.0171951	0.525183	2R	Mal-A1
FBgn0040466	1.39136	0.476492	0.01743	0.531101	3R	Dlip2
FBgn0032187	1.61201	0.688861	0.0175516	0.533043	2L	CG4839
FBgn0033205	1.98844	0.991634	0.0175765	0.533043	2R	CG2064
FBgn0002571	3.49911	1.80699	0.017883	0.540531	2R	Mal-A3
FBgn0052121	0.59219	-0.755868	0.0179073	0.540531	3L	CG32121
FBgn0033169	1.38335	0.468162	0.018034	0.543086	2R	CG11123
FBgn0085366	0.241885	-2.04761	0.0181299	0.544362	X	CG34337
FBgn0086558	1.32599	0.407073	0.0181609	0.544362	X	Ubi-p5E
FBgn0030600	1.35551	0.438839	0.0183366	0.547756	X	hiw
FBgn0015550	1.40015	0.48558	0.0183833	0.547756	3L	tap
FBgn0038803	0.756234	-0.403095	0.0184016	0.547756	3R	CG5191
FBgn0036471	2.08619	1.06087	0.0186226	0.553058	3L	CG13460
FBgn0052557	0.638904	-0.646329	0.0187157	0.553346	X	Mco4
FBgn0052547	0.635887	-0.653159	0.0187182	0.553346	X	CG32547
FBgn0020762	0.723804	-0.46633	0.0188605	0.554771	2L	Atet
FBgn0004052	0.187496	-2.41507	0.0188761	0.554771	3L	Z600
FBgn0085428	0.744455	-0.425744	0.018934	0.554771	2R	Nox
FBgn0038056	1.38772	0.472718	0.0189386	0.554771	3R	CG5961
FBgn0003086	6.04785	2.59642	0.0191612	0.558398	X	Pig1
FBgn0053263	0.360585	-1.47159	0.0191908	0.558398	3L	CG33263
FBgn0039155	1.43611	0.522169	0.0192027	0.558398	3R	Kal1
FBgn0263199	1.64818	0.720873	0.0192357	0.558398	3L	Galk
FBgn0027070	0.682214	-0.551703	0.0193357	0.56004	2L	Ugt36E1
FBgn0039430	0.746931	-0.420954	0.0194756	0.562828	3R	CG5455
FBgn0034786	0.750603	-0.413877	0.0195729	0.564332	2R	CG13531
FBgn0029093	0.75514	-0.405184	0.0196152	0.564332	2R	cathD
FBgn0033687	1.64924	0.721801	0.0196646	0.564492	2R	CG8407
FBgn0261584	1.39985	0.485274	0.0197785	0.566049	2R	CG42694
FBgn0029148	1.37192	0.456192	0.0198091	0.566049	3L	NHP2
FBgn0041182	0.725555	-0.462844	0.0198508	0.566049	2L	Tep2
FBgn0032910	0.679982	-0.556432	0.0199199	0.566049	2L	CG9265
FBgn0039042	2.07141	1.05061	0.0199384	0.566049	3R	CG13837
FBgn0037298	0.763881	-0.388581	0.0202455	0.573503	3R	Sccpdh1
FBgn0036839	0.647675	-0.626659	0.020677	0.584444	3L	SmydA-2
FBgn0259716	1.40029	0.485723	0.020768	0.584725	2L	Nepl6
FBgn0031940	2.9227	1.5473	0.0207887	0.584725	2L	CG7214
FBgn0030593	2.39791	1.26178	0.0208509	0.584725	X	CG9512
FBgn0031219	7.54342	2.91522	0.0208684	0.584725	2L	CG13694
FBgn0031634	0.517103	-0.951476	0.0209935	0.586059	2L	Ir25a
FBgn0036353	0.666229	-0.585909	0.0210277	0.586059	3L	CG10171
FBgn0085419	0.726657	-0.460654	0.0210525	0.586059	2R	Rgk2
FBgn0031693	1.50189	0.586783	0.0211581	0.587731	2L	Cyp4ac1
FBgn0000084	0.747826	-0.419226	0.0212802	0.589849	X	AnxB10
FBgn0033644	0.43829	-1.19004	0.0214448	0.592086	2R	Tret1-2
FBgn0038102	0.288166	-1.79503	0.0214844	0.592086	3R	CG14383
FBgn0038846	1.77989	0.831788	0.0214986	0.592086	3R	CG5697
FBgn0030653	1.33731	0.41933	0.0215965	0.593512	X	CG7860
FBgn0037783	3.79584	1.92442	0.0216873	0.594739	3R	Npc2c
FBgn0033697	0.650089	-0.621292	0.0220505	0.602916	2R	Cyp6t3
FBgn0034542	0.764993	-0.386482	0.022079	0.602916	2R	Fem-1
FBgn0053260	0.655304	-0.609763	0.0221349	0.603164	3L	CG33260
FBgn0036393	7.60469	2.92689	0.0222238	0.604182	3L	CG17362
FBgn0259683	2.28321	1.19106	0.022266	0.604182	2L	Ir40a
FBgn0086693	0.530821	-0.913701	0.0224713	0.608472	X	iav
FBgn0020633	1.627	0.702211	0.0225892	0.608704	3L	Mcm7
FBgn0051373	1.63207	0.706701	0.0226103	0.608704	3R	CG31373
FBgn0028514	0.0867566	-3.52688	0.0226262	0.608704	2L	CG4793
FBgn0262893	1.91941	0.940663	0.0226905	0.608704	3L	CG43248
FBgn0020414	0.691654	-0.531877	0.0227281	0.608704	2L	Idgf3
FBgn0039101	0.628179	-0.670753	0.0227632	0.608704	3R	CG16710
FBgn0039098	0.745739	-0.423257	0.0229223	0.611688	3R	GILT3
FBgn0030010	1.80205	0.849641	0.0230713	0.614394	X	CG10959
FBgn0050344	0.751097	-0.412928	0.0232012	0.616578	2R	CG30344
FBgn0029798	0.728638	-0.456727	0.0234507	0.621926	X	CG4078
FBgn0023171	1.36191	0.44563	0.0235768	0.623985	2R	rnh1
FBgn0030667	0.287575	-1.79799	0.0236354	0.624254	X	CG15599
FBgn0262484	8.19639	3.03499	0.0239589	0.631505	3L	CG43074
FBgn0033741	1.3204	0.400974	0.024162	0.634378	2R	CG8545
FBgn0020300	1.34219	0.424585	0.0241663	0.634378	3L	geko
FBgn0003089	8.04571	3.00822	0.0244343	0.63948	3L	pip
FBgn0040099	1.35815	0.441641	0.0244599	0.63948	2L	lectin-28C
FBgn0259705	1.74969	0.807097	0.0245852	0.641456	3R	CG42359
FBgn0035544	0.598854	-0.739725	0.0249022	0.644179	3L	CG15021
FBgn0033296	0.559754	-0.837135	0.0249166	0.644179	2R	Mal-A7
FBgn0032442	4.04556	2.01634	0.024923	0.644179	2L	Nepl7
FBgn0259140	0.752785	-0.40969	0.0250049	0.644179	3L	CG42255
FBgn0032246	0.755125	-0.405212	0.0250246	0.644179	2L	Wdfy2
FBgn0031678	1.34524	0.427863	0.025026	0.644179	2L	Nepl3
FBgn0036947	1.72427	0.785988	0.0250395	0.644179	3L	obst-F
FBgn0051345	2.84971	1.51082	0.0251155	0.644382	3R	CG31345
FBgn0066365	0.463259	-1.11011	0.0251958	0.644382	3L	dyl
FBgn0030369	2.15653	1.10871	0.0252582	0.644382	X	Cyp318a1
FBgn0000320	1.32693	0.408094	0.025306	0.644382	2L	eya
FBgn0033802	1.57518	0.655516	0.0253687	0.644382	2R	CG17724
FBgn0020644	2.42036	1.27522	0.0254024	0.644382	3L	Lcp65Ab1
FBgn0283461	0.419374	-1.25369	0.0255077	0.644382	3L	Drs
FBgn0035401	0.7627	-0.390813	0.0255703	0.644382	3L	Alg2
FBgn0034528	1.35494	0.438224	0.0255857	0.644382	2R	CG11180
FBgn0261681	1.73894	0.798211	0.0256057	0.644382	3L	CG42728
FBgn0034157	0.247767	-2.01294	0.0256192	0.644382	2R	resilin
FBgn0039641	1.57832	0.65839	0.0256748	0.644382	3R	CG14511
FBgn0032283	0.749951	-0.415131	0.0256973	0.644382	2L	CG7296
FBgn0037217	0.546448	-0.871845	0.0258042	0.645807	3R	CG14636
FBgn0050377	0.737753	-0.438791	0.0259822	0.648731	2R	CG30377
FBgn0038214	0.664778	-0.589056	0.0260217	0.648731	3R	CG9616
FBgn0035158	0.746466	-0.421852	0.0261099	0.649075	3L	CG13895
FBgn0038784	5.39344	2.43121	0.0261362	0.649075	3R	CG4362
FBgn0042179	1.67836	0.747051	0.0263037	0.651954	3L	Ugt305A1
FBgn0027610	0.772182	-0.372987	0.0263725	0.651954	3R	Dic1
FBgn0039520	4.87894	2.28657	0.0264039	0.651954	3R	Gr98a
FBgn0023507	0.715292	-0.483395	0.0264814	0.652618	X	D2hgdh
FBgn0036600	0.686884	-0.541862	0.0265779	0.653745	3L	CG13043
FBgn0030980	0.305103	-1.71263	0.0266455	0.654159	X	CG7406
FBgn0034400	0.771937	-0.373446	0.0268527	0.657993	2R	CG15099
FBgn0037244	0.750696	-0.413699	0.0269407	0.658897	3R	CG14647
FBgn0003257	1.35339	0.436577	0.0270125	0.659402	3R	r-l
FBgn0036891	0.755679	-0.404154	0.0271044	0.660395	3L	CG9372
FBgn0027563	0.480218	-1.05824	0.0272209	0.661982	3R	CG9631
FBgn0035791	1.70352	0.768516	0.0273931	0.663915	3L	CG8539
FBgn0036181	2.71454	1.44071	0.0274034	0.663915	3L	Muc68Ca
FBgn0030959	1.38162	0.466357	0.0275611	0.666483	X	CG6961
FBgn0031254	0.593868	-0.751787	0.027708	0.668781	2L	CG13692
FBgn0033809	0.744227	-0.426184	0.0280518	0.675812	2R	CG4630
FBgn0035563	0.157592	-2.66574	0.0282908	0.67882	3L	CG13716
FBgn0038874	1.32777	0.409011	0.0282972	0.67882	3R	ETHR
FBgn0004429	4.60215	2.20231	0.0283431	0.67882	3L	LysP
FBgn0033469	0.109395	-3.19239	0.0283873	0.67882	2R	CG12133
FBgn0053986	2.11389	1.0799	0.0284596	0.679288	3L	CG33986
FBgn0052073	8.61185	3.10632	0.0287366	0.684632	3L	CG32073
FBgn0261862	0.757546	-0.400595	0.0288646	0.685889	2R	whd
FBgn0034392	0.770731	-0.375701	0.0288958	0.685889	2R	MFS15
FBgn0264903	5.32135	2.41179	0.0291961	0.690211	3R	CG44094
FBgn0038966	0.756128	-0.403297	0.0292196	0.690211	3R	pinta
FBgn0031451	2.14562	1.10139	0.0292385	0.690211	2L	CG9961
FBgn0035811	0.620037	-0.689575	0.029614	0.697796	3L	Mcad
FBgn0035755	1.54849	0.63086	0.0297989	0.700873	3L	CG14830
FBgn0035085	0.587528	-0.767272	0.0300646	0.705833	2R	CG3770
FBgn0259791	1.45144	0.537482	0.0301818	0.706286	3L	bora
FBgn0030398	3.03801	1.60313	0.0301995	0.706286	X	Cpr11B
FBgn0266579	1.33368	0.415416	0.0302482	0.706286	3R	tau
FBgn0033304	0.572024	-0.805852	0.0305963	0.713122	2R	Cyp6a13
FBgn0260484	1.30676	0.385996	0.0307661	0.715784	X	HIP
FBgn0035551	1.88663	0.915814	0.0310667	0.721475	3L	CG7465
FBgn0036428	1.33261	0.414251	0.0314427	0.728893	3L	Gbs-70E
FBgn0039855	1.93238	0.950379	0.0315834	0.730323	3R	CG1638
FBgn0013269	1.28668	0.363651	0.0316535	0.730323	3R	Fkbp39
FBgn0037684	0.729917	-0.454196	0.0317086	0.730323	3R	Srr
FBgn0038945	5.45987	2.44887	0.0317897	0.730323	3R	CG5386
FBgn0087035	0.769264	-0.378449	0.0318211	0.730323	3L	AGO2
FBgn0002577	0.59095	-0.758891	0.0318443	0.730323	X	m
FBgn0031471	1.76557	0.820135	0.0319102	0.730534	2L	CG3117
FBgn0031178	2.22418	1.15327	0.0321481	0.733742	X	CG10918
FBgn0029573	0.193888	-2.3667	0.0321642	0.733742	X	CG14770
FBgn0032382	0.769383	-0.378226	0.0324485	0.737158	2L	Mal-B2
FBgn0036106	0.580972	-0.783458	0.0325762	0.737158	3L	CG6409
FBgn0033158	2.71706	1.44204	0.0325911	0.737158	2R	CG12164
FBgn0036501	0.67226	-0.572908	0.0325912	0.737158	3L	CG7272
FBgn0025709	1.60576	0.683254	0.0326329	0.737158	2R	CNT2
FBgn0261989	0.726264	-0.461434	0.0326571	0.737158	2R	CG42807
FBgn0021967	0.767232	-0.382265	0.0332242	0.748649	2L	ND-PDSW
FBgn0051106	3.82961	1.9372	0.0336274	0.756412	3R	CG31106
FBgn0051922	3.38399	1.75873	0.0337481	0.757651	2L	CG31922
FBgn0004654	0.755574	-0.404354	0.0338001	0.757651	X	Pgd
FBgn0031745	0.622748	-0.68328	0.0341811	0.763784	2L	rau
FBgn0040503	1.62351	0.699112	0.0341922	0.763784	2R	CG7763
FBgn0035209	1.41379	0.499567	0.034299	0.764844	3L	msd1
FBgn0038005	5.54641	2.47156	0.0344167	0.766143	3R	Cyp313a5
FBgn0052249	1.8278	0.870106	0.0347104	0.770205	3L	CG32249
FBgn0263121	0.68021	-0.555949	0.0347187	0.770205	2R	Prosalpha1
FBgn0033756	0.519648	-0.944394	0.0349678	0.774399	2R	CG17760
FBgn0032162	1.37111	0.45534	0.0351532	0.777007	2L	CG4592
FBgn0286198	0.770842	-0.375492	0.0352062	0.777007	2L	LKRSDH
FBgn0039671	1.48028	0.565874	0.0354929	0.778433	3R	CG11470
FBgn0036777	1.55312	0.635165	0.0355332	0.778433	3L	CG7341
FBgn0259937	1.32011	0.400659	0.0355338	0.778433	2R	Nop60B
FBgn0054041	Inf	Inf	0.0355948	0.778433	3R	CG34041
FBgn0086917	2.16958	1.11742	0.0356099	0.778433	3R	spok
FBgn0034420	0.781873	-0.354993	0.0356332	0.778433	2R	CG10737
FBgn0010383	0.768899	-0.379133	0.0358031	0.780822	X	Cyp18a1
FBgn0035550	1.47021	0.556024	0.0359607	0.782488	3L	CG11349
FBgn0033170	0.731855	-0.450371	0.036001	0.782488	2R	sPLA2
FBgn0003062	1.29776	0.376024	0.0360616	0.782488	2R	Fib
FBgn0038866	1.429	0.515003	0.0362279	0.784776	3R	CG5810
FBgn0030930	1.28489	0.361646	0.0364295	0.787819	X	Pgant7
FBgn0034870	0.438162	-1.19046	0.0365966	0.788691	2R	CG13559
FBgn0038660	0.744102	-0.426428	0.0366491	0.788691	3R	CG14291
FBgn0032900	0.680777	-0.554746	0.0366534	0.788691	2L	CG14401
FBgn0033830	2.98523	1.57784	0.0368101	0.790742	2R	CG10814
FBgn0034566	0.516647	-0.95275	0.0368986	0.790835	2R	CG9313
FBgn0038080	1.70739	0.771794	0.0369545	0.790835	3R	CG12279
FBgn0038130	0.772731	-0.371962	0.0370543	0.790835	3R	CG8630
FBgn0033274	1.81962	0.863636	0.0370599	0.790835	2R	CG14757
FBgn0261260	0.771597	-0.374081	0.0372291	0.79186	X	mgl
FBgn0036279	0.776174	-0.365549	0.0372307	0.79186	3L	Ncc69
FBgn0260653	0.754575	-0.406264	0.0373666	0.792278	3L	serp
FBgn0029662	1.29703	0.375216	0.0373973	0.792278	X	CG12206
FBgn0038575	0.196363	-2.34841	0.0374348	0.792278	3R	CG7208
FBgn0027866	0.685647	-0.544462	0.0375422	0.793207	3R	CG9776
FBgn0033438	1.33717	0.419178	0.0376176	0.793207	2R	Mmp2
FBgn0039580	0.77915	-0.360026	0.0377056	0.793207	3R	Gfat2
FBgn0036271	0.761945	-0.392241	0.0378112	0.793207	3L	Pbgs
FBgn0033033	0.590706	-0.759489	0.0378176	0.793207	2R	scaf
FBgn0011589	1.36133	0.445022	0.0378479	0.793207	2R	Elk
FBgn0034879	1.3299	0.41132	0.0379983	0.794705	2R	Rrp4
FBgn0028494	1.65866	0.730021	0.0380624	0.794705	2R	CG6424
FBgn0030607	1.42454	0.510498	0.0381411	0.794705	X	dob
FBgn0039518	0.122781	-3.02584	0.0381661	0.794705	3R	CG13978
FBgn0032252	1.43298	0.519014	0.0384969	0.796494	2L	loh
FBgn0039735	1.29412	0.371976	0.0384985	0.796494	3R	Nph
FBgn0033174	0.752048	-0.411104	0.0385988	0.796494	2R	CG11125
FBgn0031313	0.790739	-0.338727	0.0386859	0.796494	2L	CG5080
FBgn0036108	0.175107	-2.51369	0.0386972	0.796494	3L	Cpr67Fa1
FBgn0000357	0.488992	-1.03212	0.0387084	0.796494	3L	Cp18
FBgn0028543	0.78844	-0.342926	0.0387107	0.796494	2L	NimB2
FBgn0036362	1.54241	0.62519	0.0387464	0.796494	3L	CG10725
FBgn0023513	0.780225	-0.358038	0.0388601	0.79756	X	CG14803
FBgn0013733	0.786155	-0.347114	0.0392768	0.803963	2R	shot
FBgn0039473	2.58237	1.3687	0.0392968	0.803963	3R	CG17191
FBgn0037852	0.774964	-0.367799	0.039662	0.807051	3R	Tpc1
FBgn0263020	4.46579	2.15892	0.0397874	0.807051	2R	CG43315
FBgn0044048	1.63052	0.705336	0.0397877	0.807051	3L	Ilp5
FBgn0014469	1.57808	0.658171	0.0399036	0.807051	2R	Cyp4e2
FBgn0086447	1.69835	0.764134	0.0399366	0.807051	2L	l(2)37Cg
FBgn0037547	0.735107	-0.443974	0.0399399	0.807051	3R	CG7910
FBgn0034697	1.30206	0.380798	0.0399568	0.807051	2R	GM130
FBgn0034880	0.54255	-0.882172	0.0400086	0.807051	2R	ItgaPS5
FBgn0031791	1.77053	0.824179	0.0400113	0.807051	2L	AANATL2
FBgn0031690	0.446334	-1.16381	0.0402568	0.809768	2L	CG7742
FBgn0034988	0.767095	-0.382523	0.0402717	0.809768	2R	cN-IIIB
FBgn0260429	0.689118	-0.537178	0.0404407	0.811757	2R	CG42524
FBgn0025837	0.704399	-0.505534	0.0404965	0.811757	X	CG17636
FBgn0262608	2.03007	1.02153	0.040873	0.818031	X	CG43134
FBgn0028936	0.76065	-0.394696	0.0410475	0.82025	2L	NimB5
FBgn0034219	0.671597	-0.574333	0.0411277	0.820581	2R	mthl4
FBgn0035623	0.593391	-0.752946	0.0412002	0.820732	3L	mthl2
FBgn0011327	1.28505	0.36183	0.0413617	0.820732	3L	Uch-L5
FBgn0026320	1.30067	0.379252	0.041439	0.820732	3L	Tom
FBgn0033783	0.784354	-0.350423	0.0414975	0.820732	2R	CG17019
FBgn0003863	0.704156	-0.506033	0.0415154	0.820732	2R	alphaTry
FBgn0026721	0.785837	-0.347698	0.0415174	0.820732	2R	fat-spondin
FBgn0004898	1.34444	0.427008	0.0417274	0.823621	3R	fd96Cb
FBgn0027617	1.53195	0.615367	0.0418126	0.824041	3R	CG5808
FBgn0031263	3.61291	1.85316	0.0420256	0.826852	2L	Tspo
FBgn0030628	0.770811	-0.375551	0.0420836	0.826852	X	CG9114
FBgn0031299	0.742478	-0.42958	0.042234	0.8274	2L	CG4629
FBgn0033571	1.29334	0.371101	0.0422718	0.8274	2R	Rpb5
FBgn0265045	0.794724	-0.331474	0.042304	0.8274	2R	Strn-Mlck
FBgn0030816	1.31637	0.396564	0.0425374	0.829285	X	CG16700
FBgn0038542	0.718431	-0.477078	0.0426154	0.829285	3R	TyrR
FBgn0052793	0.563123	-0.828479	0.042701	0.829285	X	CG32793
FBgn0262811	18.3134	4.19483	0.0427387	0.829285	X	CG43182
FBgn0265272	0.134327	-2.89618	0.0427896	0.829285	2R	CG30060
FBgn0039595	1.45144	0.53748	0.0428427	0.829285	3R	AstA-R2
FBgn0262952	1.48312	0.568638	0.0428508	0.829285	mitochondrion_genome	mt:ND4
FBgn0035632	4.25177	2.08806	0.043218	0.834426	3L	Ppat-Dpck
FBgn0002533	1.60426	0.681906	0.0432459	0.834426	2R	Lcp2
FBgn0053293	1.51785	0.60203	0.0434251	0.835588	3R	CG33293
FBgn0036361	1.64561	0.71862	0.0434358	0.835588	3L	CG10154
FBgn0015032	0.732437	-0.449223	0.0435308	0.836167	3R	Cyp4c3
FBgn0030200	0.0837685	-3.57745	0.0436727	0.837646	X	RabX2
FBgn0037137	1.26747	0.341947	0.0438647	0.838719	3L	Nopp140
FBgn0265631	11.9376	3.57744	0.0439498	0.838719	2R	CG44438
FBgn0052631	15.1041	3.91687	0.0439522	0.838719	X	CG32631
FBgn0033748	1.69218	0.758887	0.043989	0.838719	2R	vis
FBgn0259243	0.786109	-0.347199	0.0441238	0.840047	3L	Pka-R1
FBgn0032713	0.718445	-0.477051	0.0442894	0.840698	2L	Ugt36D1
FBgn0038373	0.354165	-1.49751	0.0443561	0.840698	3R	CG4546
FBgn0033725	0.591281	-0.758084	0.0444214	0.840698	2R	Cpr49Ac
FBgn0027929	0.728695	-0.456614	0.0444293	0.840698	2L	NimB1
FBgn0032879	1.67708	0.745956	0.0444841	0.840698	2L	CarT
FBgn0038257	1.70109	0.76646	0.0448354	0.846095	3R	smp-30
FBgn0002933	4.18191	2.06416	0.0449213	0.846317	X	ng1
FBgn0040070	0.791298	-0.337707	0.0449785	0.846317	2L	Trx-2
FBgn0028970	0.764328	-0.387736	0.0450989	0.847346	2L	betaggt-II
FBgn0031735	2.34792	1.23138	0.0452972	0.848464	2L	CG11029
FBgn0034396	0.71594	-0.482088	0.045397	0.848464	2R	CG15097
FBgn0031245	0.642803	-0.637551	0.0454015	0.848464	2L	CG3625
FBgn0051019	0.706761	-0.500705	0.0454491	0.848464	3R	CG31019
FBgn0052203	Inf	Inf	0.0454875	0.848464	3L	Spn75F
FBgn0030597	2.0642	1.04558	0.0456647	0.849222	X	Eo
FBgn0034882	0.10752	-3.21732	0.0456743	0.849222	2R	Eglp1
FBgn0030592	0.439034	-1.1876	0.0457258	0.849222	X	CG9514
FBgn0034417	0.536933	-0.897187	0.0458826	0.850908	2R	CG15117
FBgn0035147	0.748392	-0.418134	0.0460515	0.852813	3L	Gale
FBgn0035084	0.609299	-0.714779	0.0461329	0.85285	2R	CG15861
FBgn0033405	1.62773	0.702862	0.0462294	0.85285	2R	CG13954
FBgn0036101	0.69739	-0.519962	0.046252	0.85285	3L	NijA
FBgn0002631	1.52467	0.6085	0.0463747	0.853327	3R	E(spl)m5-HLH
FBgn0015010	1.84508	0.883682	0.0464103	0.853327	X	Ag5r
FBgn0036585	15.5771	3.96135	0.0465462	0.853772	3L	CG13071
FBgn0039817	0.610833	-0.711151	0.0466797	0.853772	3R	CG15553
FBgn0038132	10.7716	3.42917	0.0467321	0.853772	3R	apn
FBgn0031929	3.30027	1.72258	0.0467456	0.853772	2L	CG18585
FBgn0265416	1.38806	0.473071	0.0468943	0.853772	X	Neto
FBgn0020270	0.770597	-0.375952	0.0469102	0.853772	2L	mre11
FBgn0002440	1.64305	0.716374	0.0469887	0.853772	3L	l(3)mbn
FBgn0263848	0.230671	-2.11609	0.0470245	0.853772	2R	CG43709
FBgn0085218	0.425146	-1.23397	0.0470902	0.853772	2R	CG34189
FBgn0051104	1.96113	0.971686	0.0470969	0.853772	3R	CG31104
FBgn0261791	1.32893	0.410269	0.0474106	0.85408	X	SNRPG
FBgn0261634	0.045534	-4.45691	0.0474477	0.85408	3L	CG42717
FBgn0020642	0.751394	-0.412359	0.0474489	0.85408	3L	Lcp65Ac
FBgn0035357	2.27976	1.18888	0.0475051	0.85408	3L	MEP-1
FBgn0034098	2.20363	1.13988	0.0475063	0.85408	2R	krimp
FBgn0263235	0.757021	-0.401595	0.0475115	0.85408	2L	Phae2
FBgn0035957	2.12237	1.08568	0.0476547	0.855461	3L	CG5144
FBgn0025879	0.727713	-0.458558	0.0480163	0.859088	3R	Timp
FBgn0053965	2.02443	1.01752	0.0480272	0.859088	3L	CG33965
FBgn0031999	4.5085	2.17265	0.0480567	0.859088	2L	CG8419
FBgn0003057	0.377033	-1.40724	0.0482082	0.85965	X	CG10598
FBgn0003074	0.800078	-0.321787	0.0482215	0.85965	2R	Pgi
FBgn0040363	1.62486	0.700318	0.0486923	0.866843	X	CG11384
FBgn0033819	0.441828	-1.17844	0.0488768	0.86879	2R	CG4714
FBgn0030933	0.365568	-1.45179	0.0489364	0.86879	X	CG6470
FBgn0033548	3.84824	1.9442	0.049159	0.870642	2R	CG7637
FBgn0034712	3.10938	1.63663	0.0491758	0.870642	2R	Alp8
FBgn0030394	0.62616	-0.675397	0.0493056	0.871741	X	Cpr11A
FBgn0263762	1.68636	0.753911	0.0493997	0.872209	3L	CG43679
FBgn0002567	0.729138	-0.455736	0.0496131	0.873295	2R	Rab32
FBgn0016076	0.749851	-0.415324	0.0497261	0.873295	2L	vri
FBgn0022160	0.778108	-0.361958	0.0497296	0.873295	2R	Gpo1
FBgn0039637	0.728044	-0.457903	0.0497366	0.873295	3R	Ctl2
FBgn0020764	0.792301	-0.335879	0.0498	0.873295	2R	Alas
FBgn0039629	0.577332	-0.792528	0.0499464	0.874015	3R	CG11842
FBgn0010433	1.4078	0.493445	0.0500171	0.874015	3R	ato
FBgn0262721	2.21636	1.14819	0.0500445	0.874015	2L	CG43165
FBgn0029712	0.658156	-0.603499	0.0502409	0.876258	X	CG15912
FBgn0051776	0.306438	-1.70633	0.0506355	0.879847	2L	CG31776
FBgn0040907	1.82128	0.864956	0.0506553	0.879847	X	mRpL33
FBgn0086711	1.50687	0.591552	0.05066	0.879847	2L	mol
FBgn0035515	0.792507	-0.335505	0.0507197	0.879847	3L	CG14997
FBgn0030096	1.30149	0.380165	0.0509307	0.88232	X	Zpr1
FBgn0037915	0.555323	-0.8486	0.0510298	0.882849	3R	CG6790
FBgn0036320	1.6886	0.755824	0.0512073	0.884733	3L	CG10943
FBgn0034989	0.785166	-0.34893	0.0513421	0.885875	2R	CG3356
FBgn0001230	1.62084	0.696742	0.0515647	0.887837	3R	Hsp68
FBgn0052856	1.43217	0.518207	0.0515936	0.887837	3R	CG32856
FBgn0031689	1.30495	0.383989	0.0517362	0.889104	2L	Cyp28d1
FBgn0014396	0.67824	-0.560131	0.0519409	0.8912	2L	tim
FBgn0003312	0.56382	-0.826694	0.0520621	0.8912	3R	sad
FBgn0031239	0.750422	-0.414226	0.0520656	0.8912	2L	CG17075
FBgn0039450	0.796819	-0.327677	0.0526875	0.900648	3R	Yif1
FBgn0032166	1.3031	0.381945	0.0530475	0.903179	2L	CG4619
FBgn0034924	0.410151	-1.28577	0.0530755	0.903179	2R	CG17658
FBgn0052792	0.352155	-1.50572	0.0530964	0.903179	X	ppk8
FBgn0260763	0.623422	-0.681718	0.0531158	0.903179	2R	CG42561
FBgn0030846	2.7519	1.46043	0.0533888	0.906625	X	CG12992
FBgn0028573	0.548291	-0.866987	0.0535092	0.907474	3L	prc
FBgn0004959	1.29627	0.374362	0.0539167	0.913184	X	phm
FBgn0032153	1.76071	0.816153	0.0540229	0.913621	2L	CG4537
FBgn0052037	0.239132	-2.06412	0.0541802	0.913621	3L	CG32037
FBgn0034390	25.4457	4.66935	0.0542213	0.913621	2R	CG15093
FBgn0034232	1.32841	0.409705	0.0542261	0.913621	2R	CG4866
FBgn0266569	1.32689	0.408047	0.0546769	0.919511	X	CG42259
FBgn0053497	1.52255	0.606488	0.0547184	0.919511	X	Sdic2
FBgn0034270	0.746455	-0.421872	0.0549113	0.921551	2R	PIG-A
FBgn0036302	0.792368	-0.335758	0.0550968	0.923462	3L	sowah
FBgn0052170	0.773088	-0.371296	0.0553129	0.92588	3L	CG32170
FBgn0033598	0.692672	-0.529755	0.0554332	0.925921	2R	Cpr47Eb
FBgn0037592	0.770689	-0.37578	0.055459	0.925921	3R	CG11737
FBgn0262880	0.179823	-2.47535	0.0558847	0.930836	2L	CG43235
FBgn0037275	0.752027	-0.411144	0.055981	0.930836	3R	CG14655
FBgn0035063	1.34895	0.431832	0.0560459	0.930836	2R	CG3594
FBgn0033728	1.83584	0.876441	0.0560969	0.930836	2R	Cpr49Ae
FBgn0032451	0.789874	-0.340306	0.0561145	0.930836	2L	spict
FBgn0259697	1.74175	0.800536	0.0565752	0.937271	3L	nvd
FBgn0029877	0.469122	-1.09197	0.0567709	0.938203	X	CG17717
FBgn0262686	1.55546	0.637341	0.056777	0.938203	X	CG43156
FBgn0261999	0.785519	-0.348282	0.0569603	0.940027	2L	Ca-Ma2d
FBgn0087013	0.805451	-0.312132	0.0572624	0.943158	3R	Karybeta3
FBgn0054057	0.698881	-0.516882	0.0573276	0.943158	3L	CG34057
FBgn0037069	2.28304	1.19096	0.0574655	0.943158	3L	Cpr78Cc
FBgn0029970	1.31992	0.400454	0.0575001	0.943158	X	Nek2
FBgn0027539	1.28763	0.364717	0.0575159	0.943158	3R	lili
FBgn0038641	1.41232	0.498068	0.0577253	0.945389	3R	ChT
FBgn0003372	10.0956	3.33566	0.0578087	0.945554	2L	Sgs1
FBgn0085334	2.55724	1.35459	0.057925	0.946254	3R	CG34305
FBgn0286786	1.40782	0.493468	0.058088	0.946776	2L	hoip
FBgn0021944	0.787826	-0.344051	0.0581038	0.946776	2L	Coprox
FBgn0034484	0.719782	-0.474368	0.0582001	0.947148	2R	CG11044
FBgn0037228	1.32492	0.405907	0.0583083	0.947713	3R	CG1092
FBgn0085736	3.55246	1.82882	0.0584338	0.947729	3L	CG40472
FBgn0025676	0.781207	-0.356223	0.0584564	0.947729	3L	CkIIalpha-i3
FBgn0262366	0.772556	-0.372289	0.0586253	0.948972	3L	CG43064
FBgn0265313	0.672967	-0.571393	0.0586803	0.948972	2R	CG44286
FBgn0023525	1.44295	0.529025	0.0589964	0.952887	X	CG3191
FBgn0034800	1.37825	0.462833	0.0592868	0.95638	2R	CG3788
FBgn0037672	1.68654	0.754066	0.059811	0.961382	3R	sage
FBgn0259715	1.47332	0.559069	0.0598153	0.961382	2L	CG42369
FBgn0053468	2.32138	1.21498	0.0598945	0.961382	2R	CG33468
FBgn0085483	1.64264	0.716013	0.0598952	0.961382	3L	CG34454
FBgn0040942	0.796268	-0.328673	0.0601179	0.963028	X	CG12643
FBgn0054001	2.01704	1.01224	0.0602148	0.963028	3L	CG34001
FBgn0004431	3.53967	1.82362	0.0603671	0.963028	3L	LysX
FBgn0259171	0.769023	-0.378902	0.0604125	0.963028	X	Pde9
FBgn0031092	0.800813	-0.320462	0.0605091	0.963028	X	CG9577
FBgn0085307	31.4842	4.97655	0.0605643	0.963028	3R	CG34278
FBgn0039737	0.811866	-0.300686	0.060581	0.963028	3R	CG7920
FBgn0050414	0.723375	-0.467184	0.0606517	0.963028	2R	CG30414
FBgn0264343	0.543837	-0.878754	0.0606702	0.963028	2L	CG43799
FBgn0003382	0.514132	-0.959789	0.0608136	0.964117	2R	sha
FBgn0011653	1.27416	0.349542	0.0611988	0.969032	3L	mas
FBgn0025643	1.25373	0.326224	0.0612963	0.969383	X	CG3588
FBgn0003748	0.802097	-0.318152	0.0614092	0.96998	2R	Treh
FBgn0036481	0.65112	-0.619005	0.0616361	0.972372	3L	CG16959
FBgn0262982	Inf	Inf	0.0618356	0.973058	3R	CG43290
FBgn0034139	0.68496	-0.545908	0.0619241	0.973058	2R	CG4927
FBgn0033945	1.45324	0.539276	0.0619534	0.973058	2R	CG12868
FBgn0037935	1.66859	0.738626	0.0619816	0.973058	3R	CG6834
FBgn0032049	0.466787	-1.09916	0.0620661	0.973199	2L	Bace
FBgn0032925	1.28658	0.363544	0.0622642	0.975119	2L	CG9246
FBgn0037225	1.9928	0.994794	0.0624841	0.977375	3R	TwdlG
FBgn0037643	0.810336	-0.303408	0.0628682	0.982191	3R	ScsbetaA
FBgn0050288	1.36591	0.449858	0.0631966	0.986127	2R	CG30288
FBgn0033853	1.26857	0.343203	0.0636319	0.991441	2R	CG6145
FBgn0031645	0.80152	-0.319189	0.063691	0.991441	2L	CG3036
FBgn0034520	0.508872	-0.974624	0.06414	0.995381	2R	lms
FBgn0262580	3.22287	1.68835	0.0641452	0.995381	3L	CG43120
FBgn0032066	15.8548	3.98685	0.0641758	0.995381	2L	LManIII
FBgn0039030	1.92397	0.944085	0.0643448	0.995504	3R	CG6660
FBgn0030001	1.95887	0.970021	0.064361	0.995504	X	cyr
FBgn0050413	7.91705	2.98496	0.0644154	0.995504	2R	CG30413
FBgn0052816	1.38953	0.4746	0.0646453	0.99786	X	CG32816
FBgn0063497	1.98391	0.988344	0.0649999	1	2R	GstE3
FBgn0037419	Inf	Inf	0.0650532	1	3R	Osi12
FBgn0029002	1.26455	0.338621	0.0650934	1	3L	miple2
FBgn0063923	0.699692	-0.515208	0.0651377	1	3L	Kaz1-ORFB
FBgn0039048	0.770884	-0.375415	0.0651878	1	3R	CG17111
FBgn0037465	0.794324	-0.3322	0.0653397	1	3R	CG1105
FBgn0002734	1.30205	0.38079	0.0654645	1	3R	E(spl)mdelta-HLH
FBgn0037290	1.34887	0.431755	0.0655956	1	3R	CG1124
FBgn0030011	1.33642	0.418372	0.0656212	1	X	Gbeta5
FBgn0026566	1.26326	0.337147	0.0657121	1	3R	CG1307
FBgn0013305	0.801664	-0.31893	0.0658098	1	2R	Nmda1
FBgn0013672	1.52252	0.606465	0.0658715	1	mitochondrion_genome	mt:ATPase6
FBgn0030120	0.437752	-1.19181	0.0658871	1	X	CG17440
FBgn0031142	1.40973	0.495421	0.0659043	1	X	r-cup
FBgn0030300	0.773003	-0.371454	0.0661218	1	X	Sk1
FBgn0083983	2.16193	1.11232	0.0661581	1	2R	mRpL34
FBgn0259740	0.798779	-0.324132	0.0662502	1	3R	CG42394
FBgn0039108	0.655119	-0.610172	0.0663528	1	3R	CG10232
FBgn0052091	1.30431	0.383285	0.0667245	1	3L	CG32091
FBgn0039489	0.74207	-0.430373	0.0667613	1	3R	CG5880
FBgn0031312	0.757234	-0.401188	0.0669754	1	2L	Tango14
FBgn0004240	2.25068	1.17036	0.0671652	1	2R	DptA
FBgn0033127	0.787705	-0.344272	0.0671901	1	2R	Tsp42Ef
FBgn0033769	1.33458	0.41639	0.0671956	1	2R	CG8768
FBgn0031676	0.777442	-0.363193	0.0674734	1	2L	senju
FBgn0051439	1.43789	0.523954	0.0675903	1	3R	Muc96D
FBgn0036906	1.41398	0.499761	0.0678902	1	3L	CG14102
FBgn0261803	1.57379	0.654246	0.0679405	1	X	CG42749
FBgn0003366	0.78522	-0.348831	0.0679578	1	X	sev
FBgn0030121	0.778688	-0.360883	0.0679955	1	X	Cfp1
FBgn0035936	1.26032	0.333789	0.0680435	1	3L	Tsp66E
FBgn0029799	0.581992	-0.780929	0.0681058	1	X	CG15772
FBgn0038129	0.789326	-0.341307	0.0682082	1	3R	TBC1D5
FBgn0038243	0.800403	-0.321202	0.0682286	1	3R	CG8066
FBgn0031127	0.522763	-0.93577	0.0683221	1	X	CG1835
FBgn0010038	0.538338	-0.893415	0.0683254	1	3R	GstD2
FBgn0054002	0.189105	-2.40274	0.0685507	1	3L	CG34002
FBgn0039053	6.67316	2.73837	0.0685571	1	3R	CG6738
FBgn0032021	1.2804	0.356591	0.0685632	1	2L	CG7781
FBgn0050025	2.38664	1.25498	0.0685669	1	2R	CG30025
FBgn0051262	1.83148	0.87301	0.0686216	1	3R	CG31262
FBgn0044872	0.683232	-0.549552	0.0686873	1	X	FucTC
FBgn0036427	0.113881	-3.1344	0.0688027	1	3L	CG4613
FBgn0025631	0.693331	-0.528384	0.0690085	1	X	moody
FBgn0262475	1.26344	0.337361	0.0690482	1	2L	bru2
FBgn0029648	0.788786	-0.342294	0.0691231	1	X	CG3603
FBgn0037618	1.62751	0.702667	0.0691517	1	3R	ouib
FBgn0037105	0.777721	-0.362676	0.0691702	1	3L	S1P
FBgn0010044	0.539905	-0.889224	0.0691927	1	3R	GstD8
FBgn0013679	1.48747	0.572865	0.0692246	1	mitochondrion_genome	mt:ND1
FBgn0085227	1.93036	0.948872	0.0695416	1	2R	CG34198
FBgn0032184	114.015	6.83308	0.0695805	1	2L	CG13135
FBgn0035768	0.594631	-0.749933	0.0696268	1	3L	CG14834
FBgn0032897	0.807569	-0.308343	0.069995	1	2L	CG9336
FBgn0026751	1.28154	0.357881	0.0700599	1	X	XRCC1
FBgn0266446	1.23972	0.310012	0.0701094	1	3R	CG45076
FBgn0000473	2.54372	1.34694	0.0701102	1	2R	Cyp6a2
FBgn0036595	1.49668	0.581767	0.0703352	1	3L	CG13046
FBgn0264848	1.25682	0.329778	0.0704916	1	3L	vih
FBgn0038238	2.33957	1.22625	0.0707669	1	3R	CG14854
FBgn0051522	0.801296	-0.319593	0.0708083	1	3R	CG31522
FBgn0035868	0.751215	-0.412703	0.0708891	1	3L	CG7194
FBgn0030539	1.4227	0.508632	0.0710076	1	X	CG1368
FBgn0036832	0	-Inf	0.0711618	1	3L	CG18223
FBgn0050489	1.47165	0.557439	0.0712742	1	2R	Cyp12d1-p
FBgn0032074	1.76175	0.81701	0.071328	1	2L	Tsp29Fa
FBgn0032585	7.98086	2.99654	0.0714401	1	2L	Nepl8
FBgn0052262	0.73293	-0.448253	0.0714609	1	3L	CG32262
FBgn0035132	0.789854	-0.340342	0.0714925	1	3L	mthl10
FBgn0040393	1.74441	0.802742	0.0716998	1	X	CG14265
FBgn0001259	1.2723	0.347443	0.0717834	1	3L	in
FBgn0027865	1.2487	0.320428	0.0718032	1	3R	Tsp96F
FBgn0035076	1.27576	0.351358	0.0720496	1	2R	Ance-5
FBgn0015926	1.29586	0.373912	0.072072	1	X	dah
FBgn0039527	0.793669	-0.333391	0.0721712	1	3R	CG5639
FBgn0051445	2.78304	1.47666	0.0721886	1	3R	CG31445
FBgn0040367	1.67822	0.746932	0.0722883	1	X	CG11382
FBgn0039748	0.695156	-0.524591	0.0724049	1	3R	CG15529
FBgn0038450	2.83929	1.50553	0.0725636	1	3R	CG17560
FBgn0033321	0.774745	-0.368206	0.0731559	1	2R	CG8738
FBgn0264753	1.75757	0.813584	0.0733394	1	2R	Rgk1
FBgn0010388	3.53292	1.82086	0.0737138	1	2R	Dro
FBgn0041579	1.96687	0.975903	0.0738017	1	2R	AttC
FBgn0037617	0.768892	-0.379147	0.0740565	1	3R	nom
FBgn0037845	1.98668	0.99036	0.0741552	1	3R	CG14694
FBgn0043903	0.685725	-0.544299	0.074227	1	X	dome
FBgn0035273	0.521227	-0.940015	0.0746486	1	3L	CG12020
FBgn0050044	2.50728	1.32612	0.0747001	1	2R	s-cup
FBgn0038006	1.93666	0.95357	0.074939	1	3R	Cyp313a2
FBgn0035521	1.33043	0.411888	0.0749448	1	3L	VhaM9.7-a
FBgn0001112	1.78783	0.838212	0.0750578	1	3R	Gld
FBgn0035582	0.628542	-0.66992	0.0755726	1	3L	CG13705
FBgn0085195	0.77232	-0.372729	0.0756945	1	2L	CG34166
FBgn0039125	1.25777	0.33087	0.0759105	1	3R	Ndc1
FBgn0263400	0.638001	-0.64837	0.0761381	1	3R	CG43446
FBgn0033307	0.559758	-0.837124	0.0762059	1	2R	CG14752
FBgn0037989	0.795286	-0.330454	0.0762139	1	3R	ATP8B
FBgn0032414	1.40307	0.48859	0.0762399	1	2L	CG17211
FBgn0030341	1.30552	0.384622	0.0765646	1	X	p24-1
FBgn0037409	0.719547	-0.474838	0.0768104	1	3R	Osi24
FBgn0052404	1.82459	0.867576	0.0768584	1	3L	Cpr65Aw
FBgn0052687	0.775168	-0.367419	0.076863	1	X	CG32687
FBgn0032689	0.806502	-0.31025	0.0769427	1	2L	CG10413
FBgn0034221	0.521894	-0.938171	0.0771636	1	2R	CG10764
FBgn0031974	1.33658	0.418551	0.0772768	1	2L	CG12560
FBgn0036509	0.8157	-0.293889	0.07791	1	3L	CG7739
FBgn0268063	0.79022	-0.339673	0.0780154	1	3L	ltl
FBgn0038665	1.66036	0.731497	0.0780164	1	3R	euc
FBgn0031662	0.718704	-0.476531	0.0780552	1	2L	CG3792
FBgn0037235	0.806281	-0.310645	0.0783318	1	3R	CG1103
FBgn0264979	0.810183	-0.30368	0.0783787	1	2L	CG4267
FBgn0051816	0.155753	-2.68267	0.0785878	1	2L	CG31816
FBgn0266448	1.31997	0.400509	0.0786046	1	3R	CG45078
FBgn0033366	0.722973	-0.467986	0.0787255	1	2R	Ance-4
FBgn0025682	0.796176	-0.32884	0.0787455	1	3L	scf
FBgn0051089	21.2236	4.4076	0.0789324	1	3R	CG31089
FBgn0003087	1.26301	0.336862	0.0790523	1	2L	pim
FBgn0011834	3.1093	1.63659	0.079102	1	X	Ser6
FBgn0036469	2.39382	1.25931	0.0791282	1	3L	CG18649
FBgn0263353	0.795121	-0.330753	0.079188	1	3R	CG11000
FBgn0025815	1.23987	0.31019	0.0797237	1	X	Mcm6
FBgn0031528	0.76869	-0.379526	0.0798948	1	2L	CG15412
FBgn0032151	1.2525	0.324811	0.0801129	1	2L	nAChRalpha6
FBgn0033081	1.24457	0.31565	0.0801358	1	2R	geminin
FBgn0030160	0.816443	-0.292576	0.0802909	1	X	CG9691
FBgn0015039	2.06772	1.04804	0.0803687	1	2R	Cyp9b2
FBgn0011288	1.28653	0.363491	0.0805874	1	3L	Snap25
FBgn0035370	1.22387	0.291449	0.0807901	1	3L	Non2
FBgn0050431	0.774016	-0.369564	0.0810014	1	2R	CG30431
FBgn0034053	0.620018	-0.689619	0.0811582	1	2R	Cyp4aa1
FBgn0264295	2.76294	1.46621	0.0811733	1	2L	CG43773
FBgn0023000	0.792408	-0.335685	0.0812604	1	3L	mth
FBgn0038960	0.448049	-1.15827	0.0812796	1	3R	CG13855
FBgn0033038	0.808494	-0.306691	0.0813079	1	2R	CG7791
FBgn0051636	1.50573	0.590462	0.0814165	1	2L	CG31636
FBgn0002891	0.785942	-0.347505	0.0814525	1	2R	DNApol-zeta
FBgn0013772	1.77112	0.824662	0.0814608	1	2R	Cyp6a8
FBgn0263397	0.797753	-0.325986	0.081779	1	2R	Ih
FBgn0069923	1.94071	0.956586	0.0818955	1	3R	CG41128
FBgn0032907	1.31377	0.39371	0.0819888	1	2L	CG9272
FBgn0050051	1.70892	0.773089	0.0821114	1	2R	Tmem18
FBgn0259167	0.722267	-0.469395	0.0821145	1	3L	CG42272
FBgn0032200	1.23471	0.304172	0.0821334	1	2L	CG5676
FBgn0085339	2.27086	1.18324	0.0822309	1	2L	CG34310
FBgn0028920	2.03479	1.02488	0.0823994	1	2L	CG8997
FBgn0050093	0.522349	-0.936913	0.0826262	1	2R	COX6AL
FBgn0036975	0.803734	-0.31521	0.0826703	1	3L	CG5618
FBgn0052641	0.590577	-0.759804	0.0827274	1	X	CG32641
FBgn0037338	1.28855	0.365751	0.082873	1	3R	Snm1
FBgn0002283	1.25401	0.326553	0.0829241	1	3L	l(3)73Ah
FBgn0032415	0.66044	-0.598501	0.0830072	1	2L	rho-6
FBgn0028425	0.791028	-0.3382	0.0830379	1	2L	JhI-21
FBgn0036410	1.23801	0.308026	0.0831734	1	3L	CG8100
FBgn0000276	Inf	Inf	0.0834346	1	3R	CecA1
FBgn0037894	1.23843	0.308511	0.0838487	1	3R	Ranbp9
FBgn0036623	1.28527	0.362073	0.0838928	1	3L	Agpat3
FBgn0030968	0.81167	-0.301034	0.08394	1	X	CG7322
FBgn0043362	0.787939	-0.343844	0.0841325	1	2L	bchs
FBgn0034490	1.4447	0.530767	0.0842625	1	2R	CG9864
FBgn0050046	0.793447	-0.333794	0.084312	1	2R	CG30046
FBgn0020643	Inf	Inf	0.0843882	1	3L	Lcp65Ab2
FBgn0030054	1.24258	0.313335	0.0844141	1	X	Caf1-180
FBgn0266178	Inf	Inf	0.0844554	1	3R	pre-mod(mdg4)-B
FBgn0031939	0.787431	-0.344774	0.0846036	1	2L	CG13796
FBgn0039294	0.7173	-0.479352	0.0848777	1	3R	Cad96Cb
FBgn0033686	1.35181	0.434889	0.0848802	1	2R	Hen1
FBgn0085491	0.586246	-0.770423	0.0850192	1	3L	CG34462
FBgn0040371	0.243146	-2.0401	0.0850761	1	X	CG12470
FBgn0000108	0.807901	-0.307749	0.0851031	1	X	Appl
FBgn0260745	0.736758	-0.440737	0.085112	1	3R	mfas
FBgn0052857	0.241529	-2.04973	0.0851744	1	X	CG32857
FBgn0037061	1.33935	0.421533	0.0852975	1	3L	CG12975
FBgn0035858	2.92255	1.54723	0.0853656	1	3L	CG13674
FBgn0032770	1.66768	0.737839	0.085512	1	2L	CG13086
FBgn0262562	0.808222	-0.307177	0.0858621	1	3R	CG43102
FBgn0015777	0.800201	-0.321566	0.0859258	1	2L	nrv2
FBgn0039464	1.2475	0.319043	0.0860072	1	3R	CG6330
FBgn0039305	1.28041	0.356607	0.086063	1	3R	CG11858
FBgn0035260	0.794544	-0.331802	0.0863307	1	3L	CG7991
FBgn0032191	0.819076	-0.28793	0.0864279	1	2L	CG5734
FBgn0030900	1.63541	0.709654	0.0864455	1	X	Him
FBgn0000216	1.2702	0.345056	0.0864777	1	3L	Brd
FBgn0004554	1.46073	0.546693	0.0869341	1	3R	Edg91
FBgn0040950	1.26066	0.33418	0.0869724	1	2L	Muc26B
FBgn0036767	4.68157	2.22699	0.0869911	1	3L	CG16775
FBgn0015037	0.692897	-0.529288	0.0870435	1	2R	Cyp4p1
FBgn0001187	0.60445	-0.726305	0.0870991	1	2R	Hex-C
FBgn0020660	1.24367	0.314599	0.0872009	1	3L	eIF4B
FBgn0038302	1.32443	0.405374	0.0875147	1	3R	CG4210
FBgn0260005	0.798666	-0.324336	0.087598	1	3R	wtrw
FBgn0005655	1.22176	0.288961	0.0876039	1	2R	PCNA
FBgn0032456	0.816403	-0.292646	0.0876143	1	2L	MRP
FBgn0038530	13.1256	3.71431	0.0876956	1	3R	AttD
FBgn0038529	17.7187	4.1472	0.0877814	1	3R	CG14323
FBgn0042175	0.8022	-0.317967	0.0878075	1	2L	CG18858
FBgn0037518	1.26624	0.340556	0.0878531	1	3R	CG2641
FBgn0033133	1.41495	0.500755	0.0879566	1	2R	Tsp42Ek
FBgn0037307	0.701506	-0.511473	0.0880549	1	3R	Tim17a2
FBgn0034330	13.0274	3.70348	0.0880908	1	2R	CG18107
FBgn0035211	1.27143	0.346452	0.0880961	1	3L	CG2211
FBgn0029818	0.822508	-0.281899	0.0880986	1	X	GAA1
FBgn0051780	0.603078	-0.729582	0.0881677	1	2L	CG31780
FBgn0015299	1.26223	0.33597	0.0883491	1	2L	Ssb-c31a
FBgn0036260	1.99398	0.995654	0.0886543	1	3L	Rh7
FBgn0085285	0.490301	-1.02826	0.0886617	1	3L	CG34256
FBgn0261068	1.28054	0.356748	0.0887587	1	2L	LSm7
FBgn0259916	1.29882	0.377202	0.0888097	1	3L	CG42445
FBgn0039687	1.28872	0.36594	0.0889408	1	3R	Naa40
FBgn0037537	0.812382	-0.299771	0.0890889	1	3R	CG2767
FBgn0053278	0.139802	-2.83854	0.0891829	1	3L	CG33278
FBgn0250757	1.62771	0.702846	0.0893329	1	3R	CG42235
FBgn0266432	0	-Inf	0.0893933	1	2R	CG45062
FBgn0050375	0.133818	-2.90166	0.0897172	1	2R	CG30375
FBgn0032269	0	-Inf	0.0897563	1	2L	w-cup
FBgn0013684	1.33835	0.420455	0.0897829	1	mitochondrion_genome	mt:ND5
FBgn0040837	1.38997	0.475055	0.0898922	1	3L	CG8620
FBgn0053977	1.35683	0.440241	0.0899262	1	3R	CG33977
FBgn0265047	5.38581	2.42916	0.0899446	1	Y	FDY
FBgn0003742	0.755274	-0.404929	0.0899999	1	2R	tra2
FBgn0035916	0.796711	-0.327871	0.0900545	1	3L	GAPsec
FBgn0035649	0.780949	-0.356699	0.0901359	1	3L	CG10483
FBgn0002565	2.38335	1.25299	0.0902937	1	3L	Lsp2
FBgn0028482	1.28783	0.364941	0.0903137	1	2L	bdl
FBgn0003377	2.27161	1.18371	0.0904636	1	3L	Sgs7
FBgn0262517	0.820706	-0.285063	0.09063	1	3L	Ltn1
FBgn0259219	0.811643	-0.301083	0.0909163	1	2R	CG42319
FBgn0250835	2.8306	1.50111	0.0909251	1	2L	CG15394
FBgn0027601	0.829053	-0.270464	0.0910781	1	X	pdgy
FBgn0052103	0.827025	-0.273997	0.0911085	1	3L	SCaMC
FBgn0034168	0.234726	-2.09095	0.0912435	1	2R	CG15614
FBgn0032615	2.24376	1.16592	0.0915235	1	2L	CG6012
FBgn0032429	0.816816	-0.291917	0.0915393	1	2L	CG5446
FBgn0260985	1.24423	0.315253	0.0915713	1	3L	RfC4
FBgn0036849	0.488307	-1.03414	0.091672	1	3L	CG14079
FBgn0086912	1.24681	0.318237	0.0917641	1	2L	mbm
FBgn0037906	0.690171	-0.534974	0.0919047	1	3R	PGRP-LB
FBgn0032362	1.94741	0.96156	0.0919341	1	2L	spz4
FBgn0262007	1.61344	0.690136	0.0919809	1	3L	CG42825
FBgn0030528	0.793925	-0.332926	0.0924369	1	X	CG11095
FBgn0000644	1.67046	0.740241	0.0926129	1	X	Fcp3C
FBgn0037377	1.24834	0.320009	0.0926228	1	3R	CG1218
FBgn0000405	1.2472	0.318691	0.0928976	1	2R	CycB
FBgn0085599	2.80739	1.48923	0.0931069	1	3L	CG41284
FBgn0260955	1.64439	0.717553	0.0932473	1	2L	CG42587
FBgn0016034	0.645973	-0.630454	0.0933523	1	3L	mael
FBgn0039028	0.406065	-1.30022	0.0933595	1	3R	CG13840
FBgn0051469	0.747335	-0.420174	0.0935673	1	3R	CG31469
FBgn0035517	0.822778	-0.281424	0.0936845	1	3L	CG1265
FBgn0040798	0.539992	-0.888989	0.0938532	1	3L	CG13069
FBgn0038610	0.756349	-0.402875	0.0939391	1	3R	CG7675
FBgn0033204	0.778058	-0.362051	0.0942056	1	2R	CG2065
FBgn0261349	0.622321	-0.684269	0.0943259	1	2L	Mst36Fb
FBgn0032753	2.54557	1.34799	0.0943597	1	2L	CG17572
FBgn0031663	0.796988	-0.327371	0.0950793	1	2L	CG8891
FBgn0267339	1.39493	0.480195	0.0950936	1	3R	p38c
FBgn0030871	1.26548	0.339685	0.0951326	1	X	CG8142
FBgn0266599	1.22193	0.289161	0.0953444	1	3R	Hsc70-4
FBgn0031357	1.2692	0.343914	0.0953569	1	2L	mRpL48
FBgn0050054	1.68095	0.749276	0.0956866	1	2R	CG30054
FBgn0053489	0.273106	-1.87247	0.0959575	1	3L	CG33489
FBgn0086443	0.819889	-0.286499	0.0960043	1	2L	AsnRS
FBgn0263390	0.813086	-0.298521	0.0960708	1	3R	Nha2
FBgn0034276	1.28326	0.359817	0.096269	1	2R	Sardh
FBgn0035496	1.34282	0.425263	0.0963103	1	3L	CG14990
FBgn0002930	0.812542	-0.299486	0.0965988	1	2R	nec
FBgn0037416	0.570035	-0.810877	0.0966848	1	3R	Osi9
FBgn0032139	2.29965	1.20141	0.0967885	1	2L	CG13116
FBgn0040733	2.25545	1.17342	0.0970051	1	2R	CG15068
FBgn0037127	0.798501	-0.324633	0.0971099	1	3L	CG14566
FBgn0039467	0.755692	-0.404129	0.097207	1	3R	CG14253
FBgn0039228	1.80127	0.849015	0.0973556	1	3R	CG6980
FBgn0020626	0.778114	-0.361947	0.0974792	1	3R	Osbp
FBgn0034197	1.6139	0.690548	0.0979752	1	2R	Cda9
FBgn0030505	0.817113	-0.291393	0.0981383	1	X	NFAT
FBgn0035817	1.72949	0.790346	0.098314	1	3L	CG7409
FBgn0023174	0.813996	-0.296906	0.0983664	1	3L	Prosbeta2
FBgn0029643	7.58477	2.9231	0.0987052	1	X	CG14420
FBgn0035427	0.808827	-0.306097	0.0987422	1	3L	ckd
FBgn0039129	2.54242	1.3462	0.0987509	1	3R	RpS19b
FBgn0044823	0.807575	-0.308332	0.0992168	1	3R	Spec2
FBgn0031522	1.49233	0.577571	0.0993808	1	2L	CG3285
FBgn0004106	1.25266	0.324993	0.0994671	1	2L	Cdk1
FBgn0051115	0.614356	-0.702854	0.0995166	1	3R	CG31115
FBgn0262577	14.7836	3.88592	0.0995597	1	3R	CG43117
FBgn0034883	0.735879	-0.44246	0.0996325	1	2R	Eglp2
FBgn0039774	0.824314	-0.278734	0.0996521	1	3R	CDase
FBgn0033589	1.27363	0.348944	0.0998501	1	2R	CG13227
FBgn0025592	0.826887	-0.274238	0.0999417	1	3L	Gk1
FBgn0036205	0.733962	-0.446223	0.0999658	1	3L	CG14131
FBgn0052405	1.90887	0.932716	0.0999819	1	3L	Cpr65Av
FBgn0016081	0.735863	-0.442491	0.100006	1	3L	fry
FBgn0037481	1.30878	0.388222	0.100035	1	3R	MAGE
FBgn0027608	0.801644	-0.318967	0.10014	1	3R	CG2082
FBgn0034626	0.798415	-0.32479	0.100156	1	2R	CG10795
FBgn0064237	1.26879	0.343457	0.100508	1	2R	Idgf5
FBgn0040089	0.807437	-0.308578	0.100652	1	X	meso18E
FBgn0024238	1.28186	0.358244	0.100674	1	X	Fim
FBgn0025720	0.826831	-0.274336	0.100745	1	2R	Ate1
FBgn0035510	1.64913	0.721705	0.10084	1	3L	Cpr64Aa
FBgn0033527	1.2867	0.363676	0.100913	1	2R	CG11777
FBgn0262531	0.362311	-1.4647	0.101034	1	3L	CG43085
FBgn0013681	2.55069	1.35089	0.101116	1	mitochondrion_genome	mt:ND3
FBgn0039131	1.39526	0.480539	0.101779	1	3R	CG12268
FBgn0028526	0.744542	-0.425574	0.101917	1	2L	CG15293
FBgn0004362	1.20627	0.270547	0.102069	1	2R	HmgD
FBgn0032801	0.752844	-0.409578	0.102238	1	2L	CG10165
FBgn0034103	1.64035	0.714003	0.102584	1	2R	prim
FBgn0052311	0.828476	-0.271468	0.10271	1	3L	zormin
FBgn0038377	2.71197	1.43934	0.103023	1	3R	CG9632
FBgn0032940	0.828361	-0.271668	0.103065	1	2L	Mondo
FBgn0041183	0.593365	-0.753009	0.103346	1	2L	Tep1
FBgn0263132	1.2134	0.279051	0.103352	1	X	Cht6
FBgn0266758	0.741576	-0.431333	0.10346	1	3R	Esyt2
FBgn0026403	0.828994	-0.270567	0.103512	1	2R	Ndg
FBgn0016794	0.820613	-0.285226	0.103521	1	3L	dos
FBgn0283450	1.73577	0.795576	0.103588	1	2R	Glo1
FBgn0039481	1.42218	0.5081	0.103606	1	3R	Cpr97Eb
FBgn0026737	0.752539	-0.410163	0.103765	1	3R	CG6171
FBgn0031512	7.80559	2.96451	0.103923	1	2L	CG15404
FBgn0250816	0.755523	-0.404453	0.104009	1	3L	AGO3
FBgn0034552	4.47328	2.16133	0.10402	1	2R	CG17999
FBgn0030082	1.2289	0.297364	0.104175	1	X	HP1b
FBgn0035375	1.21954	0.286335	0.104282	1	3L	Pgant6
FBgn0004168	1.30831	0.387703	0.104298	1	2R	5-HT1A
FBgn0034443	1.53209	0.615505	0.104382	1	2R	cer
FBgn0040236	0.816621	-0.292262	0.104419	1	X	c11.1
FBgn0032244	1.27317	0.348422	0.104425	1	2L	RfC3
FBgn0036301	1.26684	0.341234	0.10476	1	3L	CG4069
FBgn0085279	1.38136	0.466092	0.104774	1	3L	CG34250
FBgn0031141	2.46482	1.30149	0.10481	1	X	CG1304
FBgn0051337	0.755909	-0.403715	0.105058	1	3R	CG31337
FBgn0031467	4.53742	2.18187	0.105095	1	2L	Cpr23B
FBgn0040232	1.21665	0.282909	0.105128	1	2L	cmet
FBgn0010295	1.57908	0.659086	0.106001	1	X	ng3
FBgn0034935	1.43309	0.519129	0.106035	1	2R	Orcokinin
FBgn0050460	0.820073	-0.286175	0.106057	1	2R	CG30460
FBgn0029851	1.34843	0.431278	0.10637	1	X	CG14445
FBgn0036321	1.7686	0.822612	0.106461	1	3L	CG14120
FBgn0032772	0.803011	-0.316509	0.106537	1	2L	CG17350
FBgn0034497	0.760019	-0.395892	0.106606	1	2R	Mpcp1
FBgn0052817	3.98942	1.99618	0.106619	1	X	CG32817
FBgn0035082	1.23477	0.304243	0.106764	1	2R	CG2811
FBgn0035271	1.31001	0.389574	0.106978	1	3L	CG2021
FBgn0034032	1.24201	0.312673	0.107063	1	2R	CG8195
FBgn0260938	0.826351	-0.275174	0.107082	1	X	tay
FBgn0022770	1.21181	0.277163	0.107086	1	X	Peritrophin-A
FBgn0051646	0.714088	-0.485826	0.107097	1	2L	DIP-theta
FBgn0050108	1.37489	0.459321	0.107443	1	2R	CG30108
FBgn0037017	0.789918	-0.340224	0.107534	1	3L	CG4074
FBgn0038608	1.2389	0.309065	0.107629	1	3R	WRNexo
FBgn0036553	1.66447	0.735063	0.107762	1	3L	CG17027
FBgn0017551	1.24279	0.313586	0.107977	1	2L	Rca1
FBgn0035611	0.701845	-0.510776	0.108006	1	3L	CG13285
FBgn0032929	1.24398	0.314962	0.10827	1	2L	Mcm10
FBgn0039471	3.24508	1.69825	0.108548	1	3R	CG6295
FBgn0037167	0.645361	-0.631822	0.10855	1	3L	CG11425
FBgn0051450	1.26345	0.337374	0.10858	1	3R	mRpS18A
FBgn0035024	0.812346	-0.299833	0.108885	1	2R	CG11414
FBgn0035398	1.21022	0.275269	0.108906	1	3L	Cht7
FBgn0024920	1.22068	0.28768	0.108923	1	2L	Ts
FBgn0263131	0.757187	-0.401278	0.109008	1	3L	CG43373
FBgn0023175	0.82382	-0.2796	0.109023	1	2R	Prosalpha7
FBgn0040777	0.819809	-0.286639	0.109107	1	2R	CG14767
FBgn0263621	5.26041	2.39518	0.109254	1	3R	CG43630
FBgn0037204	1.35837	0.441879	0.109298	1	3L	CG11131
FBgn0085362	Inf	Inf	0.109558	1	X	Vml
FBgn0264785	0.827936	-0.272408	0.109668	1	3R	Hph
FBgn0039596	2.24893	1.16924	0.109769	1	3R	CG10000
FBgn0039642	1.32951	0.410896	0.110072	1	3R	CG11882
FBgn0035725	1.27801	0.3539	0.110119	1	3L	Mis12
FBgn0010197	1.42725	0.513242	0.110455	1	2L	Gyc32E
FBgn0026879	1.2981	0.376405	0.110574	1	X	CG13364
FBgn0032485	0.821208	-0.284181	0.110861	1	2L	CG9426
FBgn0014879	1.20725	0.271719	0.110864	1	3R	Set
FBgn0039437	Inf	Inf	0.11091	1	3R	TwdlL
FBgn0039856	0.734527	-0.445113	0.111034	1	3R	CG1774
FBgn0035538	1.2439	0.314874	0.11105	1	3L	DopEcR
FBgn0040211	1.74812	0.805805	0.111148	1	2L	hgo
FBgn0260859	2.04544	1.03241	0.111334	1	3L	Bet3
FBgn0032287	1.27447	0.3499	0.111394	1	2L	CG6415
FBgn0260027	0.72699	-0.459993	0.11149	1	3L	CG42495
FBgn0029860	0.815276	-0.29464	0.111751	1	X	CG15891
FBgn0036062	0.767047	-0.382613	0.111797	1	3L	CG6685
FBgn0046225	0.801462	-0.319295	0.111836	1	3R	CG17230
FBgn0030492	1.29957	0.378032	0.112034	1	X	CG15754
FBgn0030997	1.27721	0.352999	0.112447	1	X	CG7990
FBgn0038654	0.688247	-0.539002	0.112455	1	3R	CG14298
FBgn0035724	0.410078	-1.28603	0.112606	1	3L	CG10064
FBgn0053508	0.701532	-0.51142	0.112634	1	2L	ppk13
FBgn0030006	0.812353	-0.299821	0.11264	1	X	CG17982
FBgn0033074	0.486858	-1.03843	0.112642	1	2R	tomboy40
FBgn0267796	0.745238	-0.424226	0.112676	1	3L	Tmc
FBgn0027611	1.20383	0.267631	0.112696	1	2L	LManII
FBgn0053474	0.651273	-0.618666	0.112807	1	2R	CG33474
FBgn0035942	0.767526	-0.381713	0.112968	1	3L	ValRS-m
FBgn0030247	5.64245	2.49632	0.112997	1	X	CG15208
FBgn0051720	0.794884	-0.331183	0.113903	1	2L	mthl15
FBgn0030884	1.29255	0.370223	0.114005	1	X	CG6847
FBgn0250732	1.21435	0.280187	0.114052	1	3R	gfzf
FBgn0035845	1.78758	0.838009	0.114106	1	3L	CG13675
FBgn0036787	0.828452	-0.271509	0.114327	1	3L	CG4306
FBgn0042105	1.52201	0.605981	0.114472	1	3R	CG18748
FBgn0036583	1.51502	0.599336	0.114709	1	3L	CG13055
FBgn0035965	0.787231	-0.345142	0.114725	1	3L	Use1
FBgn0052572	0.648128	-0.625648	0.114779	1	X	CG32572
FBgn0027106	0.762743	-0.390732	0.115208	1	X	Inx7
FBgn0266441	1.22233	0.289635	0.115396	1	3L	CG45071
FBgn0051091	5.88245	2.55642	0.115799	1	3R	CG31091
FBgn0086757	1.22384	0.291415	0.116141	1	2R	cbs
FBgn0028542	0.823169	-0.280739	0.116272	1	2L	NimB4
FBgn0030509	1.81443	0.859517	0.116568	1	X	CG11162
FBgn0260964	1.24477	0.315876	0.116619	1	2R	Vmat
FBgn0262870	0.830828	-0.267378	0.116708	1	3L	axo
FBgn0260995	1.30835	0.387752	0.116806	1	2R	dpr21
FBgn0036488	1.2373	0.307197	0.116875	1	3L	CG6878
FBgn0032336	1.54485	0.627471	0.117137	1	2L	AstC
FBgn0286075	0.810828	-0.302533	0.117371	1	3R	DNAlig3
FBgn0035577	0.590725	-0.759441	0.117476	1	3L	CG13708
FBgn0035034	0	-Inf	0.11752	1	2R	CG3565
FBgn0003483	1.29631	0.374413	0.117796	1	3R	spn-E
FBgn0038398	0.539961	-0.889073	0.117887	1	3R	sxe2
FBgn0045759	0.568967	-0.813584	0.117919	1	3L	bin
FBgn0038126	0.783929	-0.351205	0.117943	1	3R	CG8483
FBgn0036228	1.27792	0.353803	0.117978	1	3L	obst-G
FBgn0030870	1.20996	0.274959	0.118126	1	X	CG6398
FBgn0085404	0.66734	-0.583507	0.118156	1	3R	CG34375
FBgn0038159	0	-Inf	0.118192	1	3R	CG14369
FBgn0038721	0.801479	-0.319263	0.118261	1	3R	subdued
FBgn0034010	0.728271	-0.457452	0.118296	1	2R	CG8157
FBgn0038746	1.24396	0.314943	0.118402	1	3R	Surf6
FBgn0037519	0.655801	-0.608669	0.118516	1	3R	CG3014
FBgn0030098	2.53919	1.34437	0.11853	1	X	CG12057
FBgn0037846	1.43067	0.516687	0.118757	1	3R	CG6574
FBgn0038100	0.832703	-0.264126	0.119035	1	3R	Paip2
FBgn0086378	1.22576	0.293681	0.119061	1	3R	Alg-2
FBgn0031501	0.648579	-0.624647	0.119089	1	2L	CG17261
FBgn0039612	0.735793	-0.442629	0.119104	1	3R	Nepl19
FBgn0259230	2.17965	1.1241	0.119201	1	2L	lectin-22C
FBgn0283508	1.19809	0.260739	0.119322	1	2R	nw
FBgn0052074	5.00387	2.32304	0.11937	1	3L	CG32074
FBgn0004618	1.28984	0.367195	0.119567	1	3R	gl
FBgn0032431	0.563869	-0.826567	0.11958	1	2L	CG5435
FBgn0031811	0.540945	-0.886447	0.120185	1	2L	CG13982
FBgn0040259	1.27744	0.353252	0.120275	1	3R	Ugt302C1
FBgn0017558	0.844232	-0.244288	0.120361	1	2R	Pdk
FBgn0027844	1.4099	0.495598	0.120676	1	2L	CAH1
FBgn0004107	1.22911	0.297619	0.120779	1	3R	Cdk2
FBgn0033179	0.817408	-0.290872	0.121003	1	2R	p47
FBgn0035679	1.33209	0.413696	0.121108	1	3L	CG10467
FBgn0050323	0.57772	-0.791559	0.121116	1	2R	CG30323
FBgn0035983	0.808026	-0.307527	0.121317	1	3L	CG4080
FBgn0043799	1.31548	0.395588	0.121394	1	3R	CG31381
FBgn0035343	0.727087	-0.459801	0.121431	1	3L	CG16762
FBgn0052829	1.86192	0.89679	0.121454	1	2L	CG32829
FBgn0033352	0.765527	-0.385476	0.121709	1	2R	PAN2
FBgn0036258	0.838701	-0.253771	0.121714	1	3L	eIF3l
FBgn0029838	0.793685	-0.333361	0.121718	1	X	CG4666
FBgn0040842	0.744747	-0.425178	0.121722	1	3L	CG15212
FBgn0031298	0.826178	-0.275475	0.121813	1	2L	Atg4a
FBgn0046302	1.40325	0.488769	0.121881	1	2L	CG10650
FBgn0036598	1.86823	0.901674	0.122114	1	3L	CG4982
FBgn0034538	0.763176	-0.389912	0.122148	1	2R	CG16799
FBgn0031519	1.48748	0.572873	0.122312	1	2L	Fign
FBgn0020639	1.71735	0.780187	0.122513	1	3L	Lcp65Af
FBgn0013949	1.26701	0.341423	0.122596	1	3R	Elal
FBgn0034296	0.7317	-0.450676	0.122798	1	2R	CG10912
FBgn0266745	0.735226	-0.44374	0.122905	1	3R	CG45218
FBgn0263200	0.844941	-0.243078	0.122998	1	2L	Galt
FBgn0040575	1.64943	0.72197	0.123067	1	3R	CG15922
FBgn0039592	0	-Inf	0.123244	1	3R	CG14062
FBgn0028533	2.05258	1.03744	0.123327	1	2L	CG7953
FBgn0050115	0.8361	-0.258252	0.123402	1	2R	GEFmeso
FBgn0038099	0.59631	-0.745864	0.123424	1	3R	CG7091
FBgn0267727	1.2005	0.263641	0.123483	1	2L	Pen
FBgn0062412	1.67146	0.741105	0.12349	1	3R	Ctr1B
FBgn0020506	0.35518	-1.49338	0.123547	1	2R	Amyrel
FBgn0261963	1.23364	0.302917	0.123602	1	2L	mid
FBgn0031850	1.24503	0.316178	0.123693	1	2L	Tsp
FBgn0036030	1.2033	0.266992	0.123747	1	3L	CG6767
FBgn0038470	1.23094	0.299765	0.123763	1	3R	CG18213
FBgn0031483	0.822499	-0.281914	0.123784	1	2L	CG9641
FBgn0259676	1.26294	0.336792	0.123798	1	3L	DNApol-alpha60
FBgn0026878	0.803983	-0.314763	0.124203	1	X	CG4325
FBgn0020645	Inf	Inf	0.124496	1	3L	Lcp65Aa
FBgn0040723	1.46286	0.548794	0.12477	1	2L	CG5011
FBgn0053493	0.819468	-0.28724	0.124934	1	3L	CG33493
FBgn0036505	0.83597	-0.258477	0.124967	1	3L	CG7945
FBgn0263782	0.755426	-0.404638	0.125193	1	3R	Hmgcr
FBgn0031058	0.569728	-0.811655	0.125236	1	X	CG14227
FBgn0020640	3.19944	1.67782	0.125476	1	3L	Lcp65Ae
FBgn0036288	0.812815	-0.299001	0.125486	1	3L	CG10660
FBgn0052068	1.22934	0.29788	0.125489	1	3L	Adi1
FBgn0023479	0.839997	-0.251544	0.12561	1	3L	teq
FBgn0040754	1.41316	0.498924	0.125654	1	2R	CG17059
FBgn0036142	0.811629	-0.301109	0.125688	1	3L	CG7616
FBgn0038073	0.489557	-1.03045	0.12576	1	3R	CG14395
FBgn0035444	0.794937	-0.331087	0.125874	1	3L	CG12012
FBgn0042630	0.790353	-0.339431	0.126145	1	3L	Sox21b
FBgn0034507	0.613833	-0.704083	0.126206	1	2R	CG11192
FBgn0083986	1.2901	0.367488	0.126282	1	3R	CG34150
FBgn0040600	0.814354	-0.296273	0.126342	1	3R	CG13631
FBgn0032467	0.829464	-0.269749	0.126561	1	2L	CG9934
FBgn0086251	0.768361	-0.380144	0.126697	1	2L	del
FBgn0261575	0.423711	-1.23885	0.126883	1	3R	tobi
FBgn0028554	1.18938	0.250206	0.126979	1	2L	x16
FBgn0283545	0.187597	-2.41429	0.127018	1	X	vilya
FBgn0036607	2.17809	1.12306	0.127414	1	3L	CG13059
FBgn0040321	1.20385	0.267652	0.127503	1	3L	GNBP3
FBgn0034543	0.78452	-0.350119	0.127551	1	2R	galla-1
FBgn0267823	0.798179	-0.325215	0.127623	1	2R	Gmer
FBgn0035697	0.365322	-1.45276	0.127838	1	3L	CG10163
FBgn0033584	0.804154	-0.314456	0.127873	1	2R	CG7737
FBgn0030510	0.764114	-0.38814	0.127876	1	X	CG12177
FBgn0038901	1.47011	0.55592	0.127884	1	3R	Burs
FBgn0030272	1.32673	0.407871	0.128107	1	X	CG15201
FBgn0038404	0.82521	-0.277166	0.128282	1	3R	CG8925
FBgn0030332	1.61194	0.688802	0.128325	1	X	CG9360
FBgn0085305	3.47602	1.79743	0.128366	1	3R	CG34276
FBgn0259229	1.56787	0.648806	0.128641	1	2L	CG42329
FBgn0028430	0.797774	-0.325948	0.128661	1	2L	He
FBgn0024989	1.26805	0.342614	0.128768	1	X	CG3777
FBgn0261341	0.837895	-0.255159	0.128946	1	3L	verm
FBgn0033729	1.49775	0.582795	0.129157	1	2R	Cpr49Af
FBgn0023170	2.40668	1.26705	0.129591	1	2R	RpL39
FBgn0033374	0.688956	-0.537516	0.129812	1	2R	CG13741
FBgn0041234	2.15973	1.11085	0.129982	1	2R	Gr59f
FBgn0010040	0.526107	-0.926572	0.130015	1	3R	GstD4
FBgn0037000	0.812316	-0.299887	0.13018	1	3L	ZnT77C
FBgn0051875	0.593064	-0.75374	0.130211	1	2L	CG31875
FBgn0040764	9.47039	3.24342	0.130313	1	2R	CG13230
FBgn0036552	1.6502	0.722639	0.130621	1	3L	CG17028
FBgn0022224	1.42553	0.511494	0.130676	1	2R	ubl
FBgn0005198	0.829485	-0.269711	0.130689	1	3L	gig
FBgn0052117	0.137091	-2.8668	0.13071	1	3L	CG32117
FBgn0004087	1.24144	0.312018	0.130755	1	3R	Dhfr
FBgn0030350	1.4072	0.492832	0.130757	1	X	SelG
FBgn0039233	1.23675	0.30655	0.130885	1	3R	CG7006
FBgn0053301	0.701624	-0.511229	0.130951	1	2L	CG33301
FBgn0038676	1.61035	0.687372	0.131041	1	3R	CG6026
FBgn0262808	0.570063	-0.810807	0.131153	1	3R	CG43179
FBgn0037242	1.98909	0.992106	0.131266	1	3R	CG9855
FBgn0027621	0.794088	-0.332629	0.131467	1	X	Pfrx
FBgn0000565	1.32201	0.402728	0.131581	1	3L	Eip71CD
FBgn0030938	1.88464	0.914285	0.131612	1	X	CG15047
FBgn0015571	4.66883	2.22306	0.131987	1	3R	alpha-Est3
FBgn0004778	3.81967	1.93345	0.132083	1	3R	Ccp84Af
FBgn0033340	1.8471	0.88526	0.132247	1	2R	CG13751
FBgn0037164	0.749503	-0.415994	0.132628	1	3L	CG11438
FBgn0086346	0.823697	-0.279815	0.132669	1	3R	ALiX
FBgn0035880	0.803241	-0.316095	0.132767	1	3L	Culd
FBgn0031002	0.792462	-0.335587	0.132959	1	X	CG14196
FBgn0031629	0.835808	-0.258756	0.133003	1	2L	Clect27
FBgn0036206	0.485331	-1.04296	0.133021	1	3L	CG5964
FBgn0032068	5.06172	2.33963	0.133738	1	2L	LManV
FBgn0024509	0.839227	-0.252867	0.133909	1	3R	Sec13
FBgn0039354	1.7048	0.769606	0.133979	1	3R	Lgr3
FBgn0022288	1.203	0.266637	0.134463	1	2R	l(2)09851
FBgn0035144	0.663418	-0.59201	0.134512	1	3L	Kah
FBgn0038429	1.26152	0.335161	0.134606	1	3R	CG14882
FBgn0034577	0.843806	-0.245017	0.134717	1	2R	cpa
FBgn0063368	1.29543	0.373429	0.13475	1	2L	Gpb5
FBgn0010052	3.63741	1.86291	0.134828	1	2R	Jhe
FBgn0083953	1.36218	0.445915	0.134989	1	3R	CG34117
FBgn0004512	1.33241	0.414035	0.135125	1	2R	Mdr49
FBgn0043470	1.94799	0.961989	0.135126	1	2R	lambdaTry
FBgn0010408	2.10988	1.07716	0.135252	1	3L	RpS9
FBgn0032901	0.796831	-0.327654	0.135437	1	2L	sky
FBgn0033362	0.664491	-0.589679	0.135448	1	2R	CG8172
FBgn0038956	0.685925	-0.543876	0.135506	1	3R	CAH8
FBgn0031161	0.833072	-0.263486	0.135545	1	X	CG15445
FBgn0037815	1.2415	0.312085	0.135597	1	3R	Rrp46
FBgn0083970	1.52417	0.608026	0.135748	1	2L	CG34134
FBgn0085459	1.50056	0.585503	0.135757	1	2R	CG34430
FBgn0035169	1.23596	0.305627	0.135793	1	3L	Dci
FBgn0037809	1.27752	0.35335	0.13585	1	3R	CG12818
FBgn0038009	1.32732	0.408518	0.136147	1	3R	CG17738
FBgn0015766	0.846297	-0.240763	0.136252	1	3L	Msr-110
FBgn0002578	1.22884	0.297295	0.136492	1	3R	Kaz-m1
FBgn0036459	5.34953	2.41941	0.136647	1	3L	CG3349
FBgn0034317	2.81697	1.49415	0.136679	1	2R	CG14499
FBgn0020907	1.38097	0.465682	0.136922	1	3R	Scp2
FBgn0020376	0.713372	-0.487273	0.137228	1	2L	Sr-CIII
FBgn0043577	0.0115098	-6.44099	0.137585	1	3L	PGRP-SB2
FBgn0051157	1.59782	0.676105	0.137608	1	3R	CG31157
FBgn0004620	0.800923	-0.320265	0.137794	1	2L	GluRIIA
FBgn0033320	1.25988	0.333281	0.137806	1	2R	CG8586
FBgn0035199	0.824783	-0.277914	0.137863	1	3L	tfc
FBgn0040066	1.19878	0.261569	0.137991	1	X	wds
FBgn0029989	0	-Inf	0.138098	1	X	CG15333
FBgn0263605	1.23685	0.306667	0.138331	1	3L	l(3)72Dn
FBgn0033943	0.715095	-0.483793	0.138497	1	2R	CG12869
FBgn0024804	1.19752	0.260047	0.138515	1	3L	Dbp80
FBgn0036999	0.831689	-0.265883	0.13852	1	3L	isoQC
FBgn0050114	2.62166	1.39048	0.139376	1	2R	CG30114
FBgn0035213	1.21313	0.278733	0.139515	1	3L	CG2199
FBgn0033731	1.31077	0.390413	0.139657	1	2R	Cpr49Ah
FBgn0039218	1.49524	0.580374	0.139734	1	3R	Rpb10
FBgn0027562	0.695757	-0.523345	0.140135	1	3R	CG10345
FBgn0035355	1.96708	0.976057	0.140156	1	3L	CG16985
FBgn0051676	1.19665	0.259005	0.140204	1	2L	CG31676
FBgn0052442	2.25902	1.17569	0.140213	1	3L	Arv1
FBgn0035308	1.22393	0.291522	0.140285	1	3L	CG15822
FBgn0036550	1.40509	0.490662	0.140412	1	3L	CG17026
FBgn0011638	1.19673	0.2591	0.140482	1	2L	La
FBgn0053108	1.31152	0.391241	0.140512	1	3R	CG33108
FBgn0043576	0.437948	-1.19117	0.140582	1	2R	PGRP-SC1a
FBgn0267376	1.20847	0.27318	0.140612	1	3R	SelR
FBgn0022069	1.19486	0.256839	0.140621	1	2L	Nnp-1
FBgn0038449	1.66976	0.739642	0.14088	1	3R	CG17562
FBgn0051121	0.829596	-0.26952	0.14097	1	3R	CG31121
FBgn0039316	0.382011	-1.38831	0.141011	1	3R	CG11893
FBgn0030638	0.80971	-0.304523	0.141101	1	X	CG11655
FBgn0034454	0.594281	-0.750783	0.141163	1	2R	CG15120
FBgn0036124	1.21466	0.280555	0.141187	1	3L	CG7839
FBgn0031660	0.840584	-0.250537	0.141245	1	2L	mRpL28
FBgn0085294	0.537685	-0.895168	0.141263	1	3L	CG34265
FBgn0029079	1.20457	0.268522	0.141425	1	2R	icln
FBgn0038134	4.31732	2.11013	0.141454	1	3R	wntD
FBgn0035626	0.756552	-0.402488	0.142027	1	3L	lin-28
FBgn0086446	0.822676	-0.281604	0.142138	1	2L	DCTN6-p27
FBgn0037534	0.826677	-0.274604	0.142141	1	3R	ELOVL
FBgn0039438	13.1934	3.72174	0.142345	1	3R	TwdlO
FBgn0263110	0.830986	-0.267104	0.142469	1	3L	CG43367
FBgn0039298	0.337266	-1.56804	0.142546	1	3R	to
FBgn0031255	0.690655	-0.533962	0.142567	1	2L	BBS8
FBgn0032620	1.39269	0.477879	0.142575	1	2L	CG12288
FBgn0032034	0.820881	-0.284756	0.142649	1	2L	Rcd4
FBgn0033812	0.835325	-0.25959	0.142751	1	2R	Pex13
FBgn0050456	1.26538	0.339565	0.142915	1	2R	CG30456
FBgn0034299	1.21769	0.284143	0.143429	1	2R	CG5757
FBgn0085465	0.727933	-0.458123	0.14353	1	3R	CG34436
FBgn0052278	1.2393	0.309525	0.143604	1	3L	CG32278
FBgn0034122	3.0599	1.61348	0.143682	1	2R	CG15711
FBgn0032017	1.2376	0.307541	0.14381	1	2L	CG7810
FBgn0005677	1.20026	0.26335	0.143861	1	2L	dac
FBgn0260008	1.28618	0.363088	0.144025	1	3L	UQCR-11
FBgn0052626	0.843307	-0.245871	0.144068	1	X	AMPdeam
FBgn0036135	1.22756	0.295788	0.144482	1	3L	mRpL2
FBgn0030847	1.19771	0.260279	0.144493	1	X	CG12991
FBgn0028406	1.36706	0.451082	0.144911	1	2L	Drep4
FBgn0085212	0.82527	-0.277062	0.145176	1	2L	CG34183
FBgn0010241	1.78254	0.833938	0.14526	1	2R	Mdr50
FBgn0038039	0.734081	-0.445988	0.145282	1	3R	CG5196
FBgn0037464	0.268613	-1.8964	0.145391	1	3R	CG1988
FBgn0028563	0.831788	-0.265713	0.145473	1	2R	sut1
FBgn0265046	3.22715	1.69026	0.145554	1	2R	CG44163
FBgn0013762	1.21809	0.284621	0.145657	1	2R	Cdk5
FBgn0028560	0	-Inf	0.145696	1	2R	sut4
FBgn0051223	1.24349	0.314396	0.145872	1	3R	CG31223
FBgn0039474	0.255512	-1.96854	0.146188	1	3R	CG6283
FBgn0037045	0.825988	-0.275808	0.146194	1	3L	CG10584
FBgn0010406	0.838963	-0.25332	0.14644	1	3L	RNaseX25
FBgn0034802	1.18425	0.243975	0.146578	1	2R	CNBP
FBgn0002709	1.86562	0.899655	0.146695	1	X	mei-218
FBgn0085411	1.51863	0.602772	0.146964	1	3L	CG34382
FBgn0031099	0.835078	-0.260018	0.146984	1	X	CG17065
FBgn0053306	1.66745	0.737643	0.147052	1	2L	CG33306
FBgn0002609	1.20284	0.266443	0.147291	1	3R	E(spl)m3-HLH
FBgn0085308	1.85676	0.892787	0.147679	1	3R	CG34279
FBgn0263025	0.794454	-0.331965	0.147794	1	3R	HSPBAP1
FBgn0002873	1.19025	0.251263	0.14785	1	X	mud
FBgn0041241	2.66499	1.41413	0.147954	1	2R	Gr47b
FBgn0003950	1.44727	0.533337	0.148113	1	X	unc
FBgn0035542	0.841813	-0.248429	0.148351	1	3L	DOR
FBgn0262881	0.367819	-1.44293	0.148361	1	2R	CG43236
FBgn0039627	1.26912	0.343829	0.148717	1	3R	CG11837
FBgn0052750	1.88592	0.915268	0.148871	1	X	CG32750
FBgn0034487	3.85831	1.94797	0.149095	1	2R	Efhc1.2
FBgn0031980	1.26181	0.335497	0.149212	1	2L	RpL36A
FBgn0030329	0.822054	-0.282696	0.1494	1	X	prtp
FBgn0033271	1.72039	0.782734	0.149484	1	2R	CG8708
FBgn0034539	0.564436	-0.825117	0.149495	1	2R	CG11159
FBgn0051809	0.712404	-0.489232	0.149516	1	2L	CG31809
FBgn0003278	1.21819	0.284738	0.149808	1	2L	RpI135
FBgn0053459	1.40296	0.488473	0.149848	1	2R	CG33459
FBgn0035790	1.47242	0.558187	0.14995	1	3L	Cyp316a1
FBgn0039349	0.841297	-0.249314	0.14999	1	3R	Ssadh
FBgn0030989	0.178066	-2.48952	0.150042	1	X	Inx5
FBgn0035120	1.20857	0.273303	0.150257	1	3L	wac
FBgn0003356	2.32135	1.21496	0.150271	1	3R	Jon99Cii
FBgn0024289	0.762616	-0.390972	0.150324	1	3R	Sodh-1
FBgn0038054	1.99606	0.997156	0.150343	1	3R	CG5509
FBgn0038632	1.36814	0.452213	0.150417	1	3R	CG14301
FBgn0033627	1.1997	0.262673	0.150428	1	2R	CG13204
FBgn0035440	0.837917	-0.25512	0.150502	1	3L	CG14969
FBgn0030013	0.861752	-0.214656	0.150617	1	X	GIIIspla2
FBgn0027654	1.21245	0.27793	0.15065	1	3R	jdp
FBgn0037566	1.20735	0.271844	0.150666	1	3R	mRpL1
FBgn0265767	1.21232	0.277774	0.150672	1	X	zyd
FBgn0000158	0.158728	-2.65538	0.150781	1	3R	bam
FBgn0038761	1.24863	0.320341	0.150825	1	3R	CG17190
FBgn0036893	0.802086	-0.31817	0.150914	1	3L	PIG-F
FBgn0259111	0.840957	-0.249895	0.15097	1	2L	Ndae1
FBgn0051698	8.48463	3.08485	0.151288	1	2L	CG31698
FBgn0031492	0.776293	-0.365326	0.151471	1	2L	CG3542
FBgn0037668	8.60787	3.10566	0.151513	1	3R	CG16736
FBgn0037345	0.784033	-0.351013	0.151543	1	3R	Rev7
FBgn0053056	0.815352	-0.294505	0.151845	1	3L	CG33056
FBgn0037801	0.762934	-0.39037	0.152022	1	3R	CG3999
FBgn0036203	0.600743	-0.73518	0.152307	1	3L	Muc68D
FBgn0259795	0	-Inf	0.152352	1	2R	loopin-1
FBgn0027529	0.848991	-0.236179	0.152483	1	2R	tapas
FBgn0260990	0.842134	-0.247878	0.152691	1	3R	yata
FBgn0052971	0	-Inf	0.152789	1	2L	CG32971
FBgn0038643	1.41967	0.505555	0.152876	1	3R	CG14300
FBgn0037101	1.55746	0.639193	0.15296	1	3L	CG7634
FBgn0037350	0.776181	-0.365534	0.153185	1	3R	CG2911
FBgn0015576	0.834085	-0.261734	0.153263	1	3R	alpha-Est8
FBgn0085466	0.789845	-0.340358	0.15327	1	3R	CG34437
FBgn0029737	0.8357	-0.258943	0.153419	1	X	CG6903
FBgn0004910	0.849945	-0.234559	0.153492	1	3L	Eip63F-1
FBgn0085320	2.90575	1.53891	0.153528	1	3R	CG34291
FBgn0029672	1.21967	0.286492	0.15364	1	X	CG2875
FBgn0085276	3.6011	1.84844	0.153656	1	3L	CG34247
FBgn0264361	2.3164	1.21189	0.153693	1	2L	CG43813
FBgn0036956	1.98103	0.986251	0.153758	1	3L	CG13813
FBgn0266421	1.20156	0.264907	0.153791	1	X	RPA3
FBgn0263761	2.54305	1.34656	0.153828	1	3L	CG43678
FBgn0051324	0.818785	-0.288444	0.153948	1	3R	CG31324
FBgn0051075	1.36916	0.453288	0.15414	1	3R	CG31075
FBgn0036443	0.202953	-2.30079	0.154568	1	3L	CG13471
FBgn0028671	0.843408	-0.245697	0.154648	1	3R	Vha100-1
FBgn0031251	0.836652	-0.2573	0.155136	1	2L	CG4213
FBgn0037363	0.843883	-0.244885	0.155521	1	3R	Atg17
FBgn0030763	1.1846	0.244397	0.155536	1	X	CG9782
FBgn0042189	0	-Inf	0.155663	1	2L	CG17376
FBgn0032198	1.18147	0.240584	0.155803	1	2L	eEF1delta
FBgn0012042	2.7118	1.43925	0.155967	1	2R	AttA
FBgn0001227	1.50433	0.589118	0.156028	1	3L	Hsp67Ba
FBgn0050008	1.37493	0.459363	0.156107	1	2R	CG30008
FBgn0000052	1.18757	0.24801	0.156141	1	2L	Pfas
FBgn0038313	4.15134	2.05358	0.157008	1	3R	CG4338
FBgn0052594	0.828732	-0.271023	0.157075	1	X	be
FBgn0036229	0.711405	-0.491257	0.157579	1	3L	CG7248
FBgn0037195	0.66574	-0.58697	0.15761	1	3L	CG11226
FBgn0051632	1.27	0.344829	0.157943	1	2L	sens-2
FBgn0036337	1.20217	0.26564	0.158255	1	3L	AdenoK
FBgn0039010	0.195319	-2.3561	0.158582	1	3R	CG4907
FBgn0037792	1.20776	0.272332	0.158652	1	3R	TAF1B
FBgn0028697	1.29583	0.373877	0.158741	1	3L	RpL15
FBgn0029999	1.23061	0.29937	0.158912	1	X	CG1575
FBgn0015011	0.798066	-0.325421	0.159472	1	3R	AhcyL2
FBgn0004780	2.41961	1.27478	0.159771	1	3R	Ccp84Ad
FBgn0034532	0.722599	-0.468732	0.159789	1	2R	CG13436
FBgn0052506	1.2643	0.338333	0.159877	1	X	CG32506
FBgn0032785	1.26388	0.337854	0.159965	1	2L	CG10026
FBgn0065035	0.813905	-0.297068	0.160265	1	X	AlkB
FBgn0033518	2.11237	1.07886	0.160362	1	2R	Prx2540-2
FBgn0032298	1.20684	0.271236	0.160632	1	2L	CG6724
FBgn0026196	1.17371	0.231081	0.160666	1	2L	nop5
FBgn0026565	0.665334	-0.58785	0.16075	1	3R	Ass
FBgn0038482	2.72023	1.44373	0.160837	1	3R	CG4053
FBgn0001233	1.29754	0.375785	0.160935	1	3L	Hsp83
FBgn0032280	2.82314	1.4973	0.161049	1	2L	CG17105
FBgn0030679	1.20693	0.271343	0.161329	1	X	CG8206
FBgn0033665	0.845632	-0.241898	0.161334	1	2R	Zip48C
FBgn0034709	0.844452	-0.243912	0.16146	1	2R	Swim
FBgn0031918	1.23661	0.306389	0.161675	1	2L	CG6055
FBgn0034972	1.73028	0.791007	0.161923	1	2R	CG10339
FBgn0286723	1.94432	0.959269	0.162055	1	2L	hll
FBgn0030081	1.22312	0.290566	0.162102	1	X	CG7246
FBgn0036850	1.22732	0.29551	0.162134	1	3L	Gem2
FBgn0032535	1.73936	0.798555	0.162142	1	2L	Ance-2
FBgn0263402	1.74182	0.800592	0.1622	1	3R	CG43448
FBgn0040395	0.843466	-0.245598	0.162269	1	X	Unc-76
FBgn0036717	1.41455	0.500348	0.162276	1	3L	CG13731
FBgn0261808	1.20036	0.263463	0.162343	1	3R	cu
FBgn0085192	1.2293	0.297839	0.162379	1	2L	CG34163
FBgn0037661	1.30787	0.387216	0.162408	1	3R	Ada
FBgn0033538	1.20527	0.269361	0.162448	1	2R	CG11883
FBgn0261703	0.83471	-0.260654	0.162452	1	X	gce
FBgn0024732	1.20654	0.270878	0.162591	1	2R	Drep1
FBgn0040092	0.745934	-0.422881	0.162641	1	2R	lectin-46Cb
FBgn0038151	1.21377	0.279491	0.162726	1	3R	yellow-e2
FBgn0021874	1.21336	0.279004	0.162756	1	2L	Nle
FBgn0030559	1.37502	0.459456	0.162766	1	X	CG13404
FBgn0052053	1.36769	0.451743	0.162767	1	3L	CG32053
FBgn0036272	1.19983	0.262829	0.162783	1	3L	Sms
FBgn0266534	0.565887	-0.821414	0.162966	1	3R	CG45095
FBgn0015568	1.32346	0.40432	0.16302	1	3R	alpha-Est1
FBgn0023477	0.853287	-0.228896	0.163319	1	2R	Taldo
FBgn0000279	4.10412	2.03707	0.163393	1	3R	CecC
FBgn0037552	1.20959	0.274515	0.163423	1	3R	CG7800
FBgn0085311	1.32786	0.409099	0.163465	1	3R	CG34282
FBgn0039415	1.27715	0.352923	0.163502	1	3R	CG6142
FBgn0003346	1.18021	0.239041	0.163592	1	2L	RanGAP
FBgn0051475	1.22049	0.287465	0.163645	1	3R	CG31475
FBgn0004432	1.17469	0.232286	0.163678	1	X	Cyp1
FBgn0039736	0.790821	-0.338576	0.163705	1	3R	CG7912
FBgn0035708	0.836685	-0.257243	0.163716	1	3L	axed
FBgn0031968	1.48294	0.56846	0.163784	1	2L	CG7231
FBgn0030034	1.17536	0.233101	0.164006	1	X	CG10555
FBgn0033754	1.24839	0.320068	0.164063	1	2R	Ak6
FBgn0033065	1.32172	0.402417	0.164109	1	2R	Cyp6w1
FBgn0037138	0.844058	-0.244585	0.164346	1	3L	P5CDh1
FBgn0036648	0.831807	-0.26568	0.164412	1	3L	CG4098
FBgn0051626	0.414086	-1.272	0.16453	1	2L	CG31626
FBgn0052708	1.22449	0.292182	0.164645	1	X	CG32708
FBgn0000253	1.18757	0.248013	0.164711	1	2R	Cam
FBgn0267795	0.844159	-0.244414	0.164791	1	3L	Frl
FBgn0039764	1.22411	0.291735	0.164914	1	3R	CG15535
FBgn0010043	0.644172	-0.634482	0.164983	1	3R	GstD7
FBgn0040775	3.2377	1.69497	0.165128	1	2R	CG12158
FBgn0026754	0.756616	-0.402366	0.165554	1	2R	Ugt37C1
FBgn0042104	0.816486	-0.292499	0.165674	1	3R	CG18747
FBgn0053169	1.28217	0.358588	0.165736	1	3L	CG33169
FBgn0047000	2.48897	1.31555	0.16582	1	3L	CG33946
FBgn0004592	1.88584	0.915209	0.165865	1	3L	Eig71Ee
FBgn0015773	0.798336	-0.324932	0.16601	1	X	NetA
FBgn0010246	0.800981	-0.32016	0.166106	1	3L	Myo61F
FBgn0038071	0.767955	-0.380906	0.16614	1	3R	Dtg
FBgn0029975	0.856704	-0.223132	0.166167	1	X	spidey
FBgn0036226	1.24928	0.321094	0.166252	1	3L	CG7252
FBgn0032304	1.58547	0.664914	0.16627	1	2L	CG17134
FBgn0016685	1.1768	0.234863	0.166403	1	3R	Nlp
FBgn0000449	0.738349	-0.437625	0.166517	1	3L	dib
FBgn0004428	0.582794	-0.778941	0.166519	1	3L	LysE
FBgn0051125	1.22125	0.288357	0.166738	1	3R	CG31125
FBgn0029813	0.672618	-0.572141	0.166772	1	X	AgmNAT
FBgn0285963	0.710389	-0.493318	0.16684	1	3R	CG46339
FBgn0020880	0.39511	-1.33967	0.166895	1	2L	CG7179
FBgn0002865	0	-Inf	0.167202	1	3R	Mst98Ca
FBgn0037611	1.46889	0.554723	0.16722	1	3R	CG11755
FBgn0036951	1.18567	0.245701	0.16725	1	3L	CG7017
FBgn0033907	1.21236	0.277819	0.16734	1	2R	mRpS16
FBgn0032749	2.78328	1.47678	0.167461	1	2L	Phlpp
FBgn0037324	0.42606	-1.23087	0.167514	1	3R	Orco
FBgn0264776	1.78834	0.838624	0.167624	1	3R	CG44014
FBgn0036266	1.26785	0.342386	0.167678	1	3L	CG5626
FBgn0026616	1.20235	0.265851	0.167856	1	3R	alpha-Man-IIb
FBgn0000591	1.2738	0.349136	0.167946	1	3R	E(spl)m8-HLH
FBgn0035969	1.19969	0.26266	0.167959	1	3L	CG4476
FBgn0045770	0	-Inf	0.167968	1	3L	S-Lap3
FBgn0030242	1.2183	0.284869	0.168161	1	X	sofe
FBgn0264894	0.855927	-0.22444	0.16851	1	2L	CG44085
FBgn0030521	0.845801	-0.241611	0.168742	1	X	CtsB1
FBgn0001404	0.829793	-0.269177	0.168969	1	X	egh
FBgn0035931	2.95061	1.56101	0.169	1	3L	CG13312
FBgn0262986	0.242252	-2.04542	0.169356	1	3L	CG43294
FBgn0036861	3.42806	1.77739	0.169473	1	3L	CG14089
FBgn0031596	0.152595	-2.71222	0.169776	1	2L	CG15429
FBgn0038455	0.848866	-0.236391	0.169797	1	3R	CG14907
FBgn0085300	0.84902	-0.23613	0.169934	1	3L	Cpr65Ay
FBgn0037888	0.576879	-0.793661	0.170013	1	3R	scpr-B
FBgn0026397	2.23344	1.15927	0.170218	1	2L	Or22b
FBgn0031032	3.60776	1.8511	0.170249	1	X	CG14204
FBgn0029837	1.24961	0.321477	0.170317	1	X	Tsp5D
FBgn0032538	1.64877	0.721393	0.17049	1	2L	Vajk2
FBgn0028949	3.01362	1.5915	0.170582	1	2L	CG15254
FBgn0010620	1.17408	0.231531	0.171063	1	2R	CG10939
FBgn0031585	0.0587135	-4.09016	0.171193	1	2L	CG2955
FBgn0085478	1.19132	0.252556	0.171202	1	X	Zdhhc8
FBgn0039811	0.644875	-0.632908	0.171381	1	3R	CG15550
FBgn0039500	2.12374	1.08661	0.171394	1	3R	CG5984
FBgn0020647	0.847038	-0.239502	0.17177	1	3R	KrT95D
FBgn0033742	0.814752	-0.295567	0.1718	1	2R	Nepl10
FBgn0051948	0	-Inf	0.171881	1	2L	CG31948
FBgn0035844	0.84927	-0.235705	0.171974	1	3L	CG13676
FBgn0033446	0.857274	-0.222173	0.172234	1	2R	CG1648
FBgn0261560	0.786235	-0.346968	0.172362	1	2L	Thor
FBgn0000551	3.9287	1.97405	0.172389	1	3L	Edg78E
FBgn0033392	0.796782	-0.327743	0.172441	1	2R	CG8027
FBgn0032420	1.20412	0.267974	0.172457	1	2L	CG6583
FBgn0250820	0.839341	-0.252672	0.172463	1	3R	meigo
FBgn0052099	0.826464	-0.274976	0.1728	1	3L	CG32099
FBgn0001217	1.66076	0.731839	0.173006	1	3R	Hsc70-2
FBgn0031288	0.69265	-0.529801	0.173064	1	2L	CG13949
FBgn0036831	1.56222	0.643595	0.173069	1	3L	CG6839
FBgn0066084	1.62557	0.700944	0.173086	1	2R	RpL41
FBgn0015001	1.77331	0.826441	0.173139	1	2R	iotaTry
FBgn0035193	0.641757	-0.639901	0.173329	1	3L	CG9192
FBgn0031418	1.49678	0.581864	0.173507	1	2L	CG3609
FBgn0035518	1.19945	0.262371	0.173615	1	3L	CG15011
FBgn0027259	1.25007	0.32201	0.173836	1	X	Kmn1
FBgn0033963	0	-Inf	0.17387	1	2R	CG12857
FBgn0040931	1.5921	0.670932	0.174337	1	X	CG9034
FBgn0030710	1.19856	0.261306	0.174355	1	X	CG8924
FBgn0011260	1.18044	0.239321	0.174368	1	2R	Sema2a
FBgn0033357	1.39794	0.483304	0.174443	1	2R	Tom7
FBgn0039184	0.671163	-0.575264	0.174568	1	3R	CG6432
FBgn0030544	0.767419	-0.381914	0.174777	1	X	CG13403
FBgn0030834	1.20895	0.273754	0.174889	1	X	CG8675
FBgn0262563	1.65717	0.728724	0.174955	1	2R	CG43103
FBgn0051690	0.795042	-0.330897	0.17518	1	2L	CG31690
FBgn0039820	0.684748	-0.546355	0.175512	1	3R	CG15554
FBgn0035665	1.36195	0.445678	0.175532	1	3L	Jon65Aiii
FBgn0038421	1.94054	0.956456	0.175609	1	3R	CG17931
FBgn0039475	0.0956461	-3.38615	0.175614	1	3R	CG6277
FBgn0033890	1.19645	0.258765	0.175703	1	2R	Ctf4
FBgn0036886	1.20674	0.271118	0.175765	1	3L	CG9300
FBgn0033782	0.810298	-0.303475	0.175856	1	2R	sug
FBgn0033365	1.2366	0.306377	0.175858	1	2R	CG8170
FBgn0033507	1.22291	0.290319	0.176049	1	2R	CG12909
FBgn0040529	0.855053	-0.225915	0.176136	1	3R	COX7A
FBgn0046878	0.742715	-0.42912	0.176176	1	3R	Obp83cd
FBgn0002069	0.847716	-0.238347	0.176567	1	2R	AspRS
FBgn0038919	1.20526	0.269341	0.176736	1	3R	Qsox2
FBgn0002534	1.46733	0.553189	0.176982	1	2R	Lcp3
FBgn0001134	0.774538	-0.368593	0.177104	1	3L	Grd
FBgn0044511	2.23385	1.15953	0.177149	1	3R	mRpS21
FBgn0041156	1.19901	0.261843	0.177163	1	3L	exex
FBgn0030817	0.819367	-0.287419	0.177208	1	X	CG4991
FBgn0032299	Inf	Inf	0.177469	1	2L	CG17127
FBgn0031115	1.19705	0.259487	0.17755	1	X	CG11710
FBgn0053458	0.363888	-1.45843	0.177694	1	2R	CG33458
FBgn0035798	0.790266	-0.33959	0.177716	1	3L	frac
FBgn0011244	0	-Inf	0.177718	1	2L	Hsp60B
FBgn0054003	0.844499	-0.243833	0.177865	1	2L	NimB3
FBgn0028886	0.79823	-0.325124	0.177884	1	2L	CG15279
FBgn0250746	0.851849	-0.23133	0.178093	1	3R	Prosbeta7
FBgn0038400	0.855167	-0.225721	0.178149	1	3R	CG5903
FBgn0260477	0.76151	-0.393064	0.178173	1	2R	CG30283
FBgn0011692	1.17302	0.230233	0.178261	1	3L	pav
FBgn0027508	0.845208	-0.242622	0.178389	1	3R	Tnks
FBgn0038756	0.455764	-1.13364	0.178546	1	3R	CG4783
FBgn0031289	1.29425	0.372115	0.178589	1	2L	CG13950
FBgn0003375	1.69532	0.761558	0.178626	1	3R	Sgs5
FBgn0041087	1.21105	0.276256	0.178651	1	2R	wun2
FBgn0040007	1.22527	0.2931	0.17875	1	2R	RpL38
FBgn0002569	1.87432	0.906364	0.179294	1	2R	Mal-A2
FBgn0010611	0.752646	-0.409957	0.179317	1	2R	Hmgs
FBgn0051848	5.46742	2.45086	0.179506	1	2L	CG31848
FBgn0036528	0.161078	-2.63417	0.179615	1	3L	CG7579
FBgn0035677	0.824458	-0.278482	0.179632	1	3L	CG13293
FBgn0052704	0.505751	-0.9835	0.179782	1	X	Ir8a
FBgn0050458	2.13679	1.09544	0.179788	1	2R	CG30458
FBgn0038958	2.11771	1.0825	0.180308	1	3R	CG13857
FBgn0036822	2.93747	1.55457	0.180416	1	3L	NijB
FBgn0053124	1.51558	0.59987	0.180544	1	2L	CG33124
FBgn0285954	1.1625	0.217231	0.180553	1	X	caz
FBgn0041629	0.845757	-0.241685	0.180617	1	X	Hexo2
FBgn0015574	3.04787	1.6078	0.180779	1	3R	alpha-Est6
FBgn0262782	0.860311	-0.217069	0.180808	1	2L	Mdh1
FBgn0046294	0	-Inf	0.180828	1	2R	CG12699
FBgn0263260	0.741363	-0.431749	0.181049	1	2R	sel
FBgn0034731	1.26818	0.342755	0.181149	1	2R	CG10384
FBgn0038892	0.0854166	-3.54934	0.181151	1	3R	CG15498
FBgn0002031	1.1716	0.228485	0.181302	1	2L	l(2)37Cc
FBgn0038213	0.652873	-0.615126	0.181707	1	3R	CG9624
FBgn0037454	0	-Inf	0.181731	1	3R	CG1137
FBgn0035434	6.09023	2.6065	0.181966	1	3L	Drsl5
FBgn0003607	1.17096	0.227697	0.182008	1	2L	Su(var)205
FBgn0030813	1.23474	0.304206	0.182017	1	X	CG4949
FBgn0083960	0.417527	-1.26006	0.182204	1	2L	CG34124
FBgn0014417	1.19928	0.262166	0.182583	1	2L	CG13397
FBgn0032172	0.842443	-0.24735	0.182627	1	2L	CG5850
FBgn0035978	1.17796	0.236296	0.18274	1	3L	UGP
FBgn0030960	1.20507	0.269121	0.183101	1	X	Atg101
FBgn0038984	0.86283	-0.212852	0.183107	1	3R	AdipoR
FBgn0027538	1.19985	0.262858	0.183164	1	2R	beta4GalNAcTA
FBgn0039038	0.735965	-0.442291	0.183249	1	3R	CG6688
FBgn0038809	0.858262	-0.220509	0.183317	1	3R	CG16953
FBgn0037070	2.57513	1.36465	0.183462	1	3L	CG11309
FBgn0052029	0.765776	-0.385005	0.183584	1	3L	Cpr66D
FBgn0267726	0	-Inf	0.183634	1	2L	CG46059
FBgn0034611	0.853892	-0.227874	0.183693	1	2R	MFS16
FBgn0031996	1.17732	0.235504	0.183761	1	2L	CG8460
FBgn0034642	1.52471	0.608538	0.183861	1	2R	CG15674
FBgn0036053	0.855443	-0.225257	0.184064	1	3L	iPLA2-VIA
FBgn0051133	0.808647	-0.306417	0.184093	1	3R	Slimp
FBgn0034761	1.20511	0.269165	0.184515	1	2R	CG4250
FBgn0260388	1.1982	0.260874	0.184889	1	3L	CG42514
FBgn0038989	1.19461	0.256539	0.184963	1	3R	CG6937
FBgn0031001	1.37538	0.459827	0.184969	1	X	CG7884
FBgn0038516	2.02232	1.01601	0.185095	1	3R	P5cr-2
FBgn0035640	1.196	0.258218	0.185141	1	3L	mad2
FBgn0038903	1.31958	0.400075	0.185174	1	3R	RpI12
FBgn0034710	3.51759	1.81459	0.185473	1	2R	Alp7
FBgn0033294	2.52276	1.335	0.185501	1	2R	Mal-A4
FBgn0035541	1.19514	0.257174	0.18562	1	3L	CG15019
FBgn0261925	0.200785	-2.31627	0.18565	1	2L	CG42792
FBgn0023524	1.20871	0.273464	0.185731	1	X	CG3078
FBgn0031715	3.47465	1.79687	0.18574	1	2L	tomb
FBgn0050099	0.659126	-0.601375	0.185837	1	2R	CG30099
FBgn0261847	10.8169	3.43521	0.185873	1	3R	CG42779
FBgn0261535	1.20253	0.266078	0.186067	1	2L	l(2)34Fd
FBgn0032493	Inf	Inf	0.186086	1	2L	Mabi
FBgn0267912	1.17089	0.227605	0.1863	1	X	CanA-14F
FBgn0033717	0.860005	-0.217582	0.186336	1	2R	CG8839
FBgn0035426	0.612802	-0.706507	0.186677	1	3L	CG12078
FBgn0032596	0.849019	-0.236131	0.186683	1	2L	Prosbeta4
FBgn0069913	1.45222	0.538262	0.186718	1	2R	CG4681
FBgn0010894	1.17492	0.232563	0.186914	1	3L	sinu
FBgn0086371	0.83778	-0.255357	0.186942	1	3R	poly
FBgn0039727	1.17631	0.234265	0.187016	1	3R	Vps13B
FBgn0065110	2.42457	1.27773	0.187049	1	2L	ppk10
FBgn0087012	0.767958	-0.380901	0.18752	1	3R	5-HT2A
FBgn0029950	1.30567	0.384792	0.187535	1	X	CG9657
FBgn0030836	2.37961	1.25073	0.187697	1	X	CG8664
FBgn0039486	1.35489	0.438173	0.187702	1	3R	CAH9
FBgn0035718	2.52384	1.33562	0.187773	1	3L	CG14820
FBgn0260795	1.1739	0.231306	0.187778	1	3L	NaPi-III
FBgn0030494	1.47772	0.56337	0.187925	1	X	Cpr12A
FBgn0039350	0.854027	-0.227646	0.18799	1	3R	jigr1
FBgn0051957	0.769446	-0.378108	0.188032	1	2L	CG31957
FBgn0050360	0.813706	-0.29742	0.18806	1	2R	Mal-A6
FBgn0001226	1.38463	0.469498	0.188111	1	3L	Hsp27
FBgn0003980	7.81357	2.96598	0.188118	1	2L	Vm26Ab
FBgn0013683	4.49406	2.16802	0.188315	1	mitochondrion_genome	mt:ND4L
FBgn0085197	0	-Inf	0.188349	1	2L	CG34168
FBgn0015801	0.843503	-0.245535	0.188444	1	2R	Reg-5
FBgn0033817	1.35574	0.439086	0.188628	1	2R	GstE14
FBgn0051860	0.512538	-0.96427	0.188702	1	2L	ZnT33D
FBgn0027596	0.860391	-0.216935	0.188703	1	2R	Kank
FBgn0025391	0.744939	-0.424806	0.188985	1	X	Scgdelta
FBgn0014342	1.2293	0.297837	0.189217	1	3R	mia
FBgn0265512	0.859584	-0.21829	0.189414	1	2R	mlt
FBgn0033904	1.66991	0.739769	0.189888	1	2R	CG18327
FBgn0033834	0.0835335	-3.5815	0.189893	1	2R	CG4744
FBgn0020304	0.856289	-0.223831	0.189935	1	2L	drongo
FBgn0034907	0	-Inf	0.190016	1	2R	CG5539
FBgn0035313	0.823325	-0.280467	0.190076	1	3L	CG13810
FBgn0050053	1.86059	0.895759	0.190232	1	2R	CG30053
FBgn0039611	0.849463	-0.235376	0.190269	1	3R	Nepl18
FBgn0033020	0.591009	-0.758747	0.190279	1	2R	COX4L
FBgn0001137	1.22807	0.296397	0.190349	1	2L	grk
FBgn0037463	0.150979	-2.72758	0.19057	1	3R	djl
FBgn0040786	1.78912	0.83925	0.190647	1	3L	CG14104
FBgn0001341	1.23771	0.30767	0.190922	1	X	Mybbp1A
FBgn0004858	1.17605	0.233952	0.19115	1	2L	elB
FBgn0031868	1.18044	0.239328	0.191249	1	2L	Rat1
FBgn0031020	0.859823	-0.217888	0.19126	1	X	Naa15-16
FBgn0262619	1.19305	0.254656	0.19129	1	2R	DNAlig1
FBgn0266284	1.19031	0.251336	0.191304	1	X	Ns3
FBgn0034840	0	-Inf	0.191738	1	2R	CG3124
FBgn0031516	0.834779	-0.260533	0.191746	1	2L	CG9663
FBgn0260000	0.851694	-0.231592	0.191767	1	2L	CG17570
FBgn0028931	0.826886	-0.27424	0.191926	1	2L	CG16863
FBgn0024183	1.16236	0.217055	0.192078	1	2L	vig
FBgn0038508	2.9831	1.57681	0.192089	1	3R	CG5866
FBgn0035192	0.796289	-0.328637	0.192105	1	3L	CG9194
FBgn0036686	1.17362	0.230964	0.192121	1	3L	CG7728
FBgn0041229	0.308535	-1.69649	0.19226	1	3R	Gr93a
FBgn0034877	0.843927	-0.24481	0.192434	1	2R	levy
FBgn0030731	0.872379	-0.196972	0.192631	1	X	Mfe2
FBgn0053502	0.560177	-0.836044	0.192694	1	X	CG33502
FBgn0002906	1.21092	0.276101	0.192822	1	3R	Blm
FBgn0004368	0.850204	-0.234119	0.192898	1	X	Ptp4E
FBgn0000078	0.374948	-1.41524	0.192956	1	2R	Amy-d
FBgn0041188	0.852073	-0.230951	0.193072	1	3R	Atx2
FBgn0039241	1.54917	0.631496	0.193076	1	3R	CG11089
FBgn0037979	0.851091	-0.232615	0.193102	1	3R	GCC185
FBgn0003651	0.851496	-0.231929	0.193146	1	3R	svp
FBgn0037891	0.859493	-0.218443	0.193267	1	3R	CG5214
FBgn0031110	2.75292	1.46096	0.19378	1	X	Obp19b
FBgn0036336	1.40242	0.487914	0.193818	1	3L	ste14
FBgn0019929	0.583026	-0.778368	0.194085	1	X	Ser7
FBgn0030859	0.510119	-0.971096	0.194293	1	X	CG12990
FBgn0015351	1.2412	0.311737	0.194666	1	3R	CG14906
FBgn0001224	0.681149	-0.553957	0.194927	1	3L	Hsp23
FBgn0003326	1.17503	0.232695	0.194961	1	2R	sca
FBgn0000439	1.32523	0.406245	0.195052	1	3R	Dfd
FBgn0021895	0.812315	-0.29989	0.195262	1	2R	ytr
FBgn0030985	0.630351	-0.665773	0.195302	1	X	Obp18a
FBgn0031836	1.184	0.243666	0.195552	1	2L	CG11050
FBgn0033421	0.850107	-0.234284	0.195578	1	2R	CG1888
FBgn0034785	1.87142	0.904131	0.195611	1	2R	CG3649
FBgn0037822	1.18952	0.250377	0.195619	1	3R	CG14683
FBgn0038110	0.830736	-0.267538	0.195632	1	3R	CG8031
FBgn0262123	0.820603	-0.285244	0.195664	1	2R	l(2)41Ab
FBgn0045064	0.69659	-0.521618	0.19572	1	2L	bwa
FBgn0250755	0.814548	-0.295929	0.195782	1	3R	CG42233
FBgn0032401	0.81079	-0.302601	0.195786	1	2L	Plzf
FBgn0033807	0.814504	-0.296007	0.195863	1	2R	AQP
FBgn0029821	1.2449	0.316027	0.196193	1	X	CG4020
FBgn0033659	1.47272	0.558485	0.196565	1	2R	Damm
FBgn0025802	0.85144	-0.232023	0.196698	1	3R	Sbf
FBgn0038179	0.825598	-0.276488	0.196743	1	3R	CG9312
FBgn0038049	0.850714	-0.233253	0.196809	1	3R	Srlp
FBgn0025454	1.29462	0.372531	0.197239	1	2R	Cyp6g1
FBgn0030063	1.19398	0.255777	0.197451	1	X	CG1789
FBgn0001168	0.853208	-0.22903	0.197825	1	3L	h
FBgn0037121	1.18461	0.244418	0.197847	1	3L	Rpb8
FBgn0025684	1.16836	0.224487	0.197993	1	2L	MFS18
FBgn0002284	0.854586	-0.226703	0.198246	1	3L	Prosbeta6
FBgn0003388	1.31498	0.395036	0.198322	1	3L	shd
FBgn0031653	0.419841	-1.25209	0.19842	1	2L	Jon25Biii
FBgn0031930	2.26903	1.18208	0.198454	1	2L	CG7025
FBgn0028648	1.19221	0.253634	0.198527	1	3L	mRpL50
FBgn0033464	0.765974	-0.384632	0.19858	1	2R	CG1441
FBgn0032132	1.54193	0.624737	0.198662	1	2L	CG4382
FBgn0034215	0.853596	-0.228374	0.198715	1	2R	Mtap
FBgn0052409	1.17771	0.235985	0.198792	1	3L	CG32409
FBgn0050484	0.53139	-0.912157	0.198895	1	2R	CG30484
FBgn0031170	1.32414	0.405052	0.198941	1	X	ABCA
FBgn0033443	0.787949	-0.343826	0.19896	1	2R	CG1698
FBgn0030720	1.17787	0.236175	0.199008	1	X	CG8939
FBgn0038680	0.755342	-0.404798	0.19908	1	3R	Cyp12a5
FBgn0038065	0.85744	-0.221892	0.19913	1	3R	Snx3
FBgn0024179	0.855787	-0.224676	0.19916	1	3L	wit
FBgn0037071	0.843129	-0.246174	0.199286	1	3L	CG7632
FBgn0032452	1.46827	0.554115	0.199301	1	2L	CG15484
FBgn0053340	0	-Inf	0.199305	1	3R	CG33340
FBgn0052548	0.149908	-2.73785	0.199339	1	X	CG32548
FBgn0003295	1.31053	0.390151	0.19938	1	3L	ru
FBgn0033504	0.873827	-0.194581	0.199438	1	2R	CAP
FBgn0000045	0.712473	-0.489092	0.199983	1	3L	Act79B
FBgn0034382	0.68344	-0.549112	0.200039	1	2R	CG18609
FBgn0259113	1.17239	0.229458	0.200042	1	3R	DNApol-alpha180
FBgn0015288	0.859264	-0.218827	0.200069	1	X	RpL22
FBgn0038007	1.83985	0.879585	0.200159	1	3R	Cyp313a3
FBgn0015570	1.42398	0.509929	0.200726	1	3R	alpha-Est2
FBgn0030926	0.835748	-0.25886	0.201062	1	X	psh
FBgn0034512	0.672834	-0.571677	0.201421	1	2R	CG18067
FBgn0034986	1.20078	0.263969	0.201435	1	2R	mRpS17
FBgn0031959	1.28895	0.366196	0.201486	1	2L	spz3
FBgn0031650	1.71654	0.779504	0.201543	1	2L	CG14044
FBgn0053054	1.7142	0.777537	0.201862	1	3L	CG33054
FBgn0083975	1.24684	0.318278	0.201882	1	3R	Nlg4
FBgn0286782	0.711316	-0.491438	0.201919	1	2R	flz
FBgn0039114	0.811411	-0.301495	0.202139	1	3R	Lsd-1
FBgn0030807	0.311535	-1.68253	0.202215	1	X	CG13000
FBgn0028892	0	-Inf	0.202343	1	2L	CG4161
FBgn0031879	0.852889	-0.22957	0.202453	1	2L	uif
FBgn0035312	1.26405	0.338052	0.202503	1	3L	CG15820
FBgn0035423	1.17021	0.226761	0.202506	1	3L	eIF1
FBgn0053774	1.82553	0.868317	0.202548	1	2R	CG33774
FBgn0085481	0.79448	-0.331918	0.202736	1	3L	CG34452
FBgn0052264	1.16896	0.225224	0.202764	1	3L	CG32264
FBgn0003374	1.61065	0.687641	0.202802	1	X	Sgs4
FBgn0039274	1.20843	0.273136	0.202892	1	3R	CG11920
FBgn0037835	1.60038	0.678419	0.202903	1	3R	CG14687
FBgn0032069	3.6716	1.87641	0.202968	1	2L	LManVI
FBgn0034694	0.852188	-0.230756	0.203049	1	2R	Plekhm1
FBgn0261262	1.19338	0.255059	0.203202	1	3R	CG42613
FBgn0286222	1.1767	0.234749	0.20325	1	X	Fum1
FBgn0027793	0.85997	-0.217641	0.203323	1	X	CG14787
FBgn0003513	1.23897	0.30914	0.203397	1	3R	ss
FBgn0263977	1.16523	0.220617	0.203415	1	3R	Tim17b
FBgn0032006	0.86802	-0.2042	0.203629	1	2L	Pvr
FBgn0032725	1.17306	0.230279	0.203697	1	2L	Nedd8
FBgn0010105	1.17954	0.238227	0.203717	1	3L	comm
FBgn0011286	0.858706	-0.219763	0.203925	1	2R	RyR
FBgn0010423	0.851253	-0.23234	0.203942	1	2R	TpnC47D
FBgn0038535	0.850381	-0.233818	0.20398	1	3R	alt
FBgn0031713	0.850221	-0.234089	0.204081	1	2L	Coq6
FBgn0029711	1.18247	0.241806	0.204248	1	X	Usf
FBgn0039476	1.55621	0.638038	0.204621	1	3R	CG6271
FBgn0034217	1.28136	0.357678	0.204626	1	2R	Lhr
FBgn0000412	1.15469	0.207511	0.204706	1	3R	D1
FBgn0014029	1.16168	0.21621	0.20509	1	3R	Sep2
FBgn0030319	0.522551	-0.936356	0.205285	1	X	CG2533
FBgn0025457	1.15905	0.212945	0.205345	1	3R	Bub3
FBgn0017577	1.16456	0.219784	0.205538	1	3R	Mcm5
FBgn0284246	1.18167	0.240826	0.205702	1	2R	l(2)k09848
FBgn0003373	2.59207	1.3741	0.205717	1	3L	Sgs3
FBgn0036537	1.16386	0.218912	0.206002	1	3L	CG18081
FBgn0036046	1.27607	0.351705	0.206031	1	3L	Ilp2
FBgn0011276	1.4538	0.539828	0.206032	1	X	HLH3B
FBgn0003888	0.759733	-0.396435	0.206055	1	2R	betaTub60D
FBgn0026404	1.23376	0.303062	0.206065	1	3L	Dronc
FBgn0033635	1.32343	0.404284	0.20619	1	2R	Prip
FBgn0259834	0.831864	-0.265581	0.206351	1	X	out
FBgn0035335	1.19901	0.261848	0.2064	1	3L	mRpL23
FBgn0030574	0.77003	-0.377013	0.20655	1	X	sbm
FBgn0029644	9.74912	3.28527	0.206646	1	X	CG14421
FBgn0029508	1.30193	0.380651	0.20667	1	2R	Tsp42Ea
FBgn0031747	0.400626	-1.31967	0.20668	1	2L	CG9021
FBgn0010329	1.23452	0.303948	0.206778	1	X	Tbh
FBgn0051199	0.484351	-1.04588	0.207057	1	3R	CG31199
FBgn0032170	0.861807	-0.214563	0.207106	1	2L	CG4658
FBgn0034245	1.96505	0.974564	0.207134	1	2R	UQCR-6.4
FBgn0036208	1.212	0.277389	0.207151	1	3L	CG10361
[truncated: 10,891 more rows]
